# Supplementary material for: Genomic landscape of diffuse glioma revealed by whole genome sequencing
Source: Research Square preprint supplement (doi:10.21203/rs.3.rs-3470361/v1), 2023-11-03
Supplement: Supplementary file 1 [file 01c7a7fa0f5f8022d368fbef.xlsx]

## Sheet: ST1 - patient tumour summary
	Supplementary Table 1: Patient demographics and tumour characteristics
	Feature	Astrocytoma, IDH mutant (n=89)	Oligodendroglioma, IDH mutant, and 1p/19q co-deleted (n=58)	Glioblastoma, IDH wildtype (n=256)	P-value
	Clinical
	Type (n)
	Primary tumour	67 (75.3%)	39 (67.2%)	232 (90.6%)	<0.001
	Recurrence	22 (24.7%)	19 (32.8%)	24 (9.4%)
	Histology (n)
	WHO grade 2	33 (37.1%)	20 (34.5%)	0 (0.0%)	<0.00001
	WHO grade 3	34 (38.2%)	38 (65.5%)	0 (0.0%)
	WHO grade 4	22 (24.7%)	0 (0.0%)	256 (100.0%)
	Laterality (n)
	Left	>35	>25	>110	>0.05
	Right	>45	>30	>140
	Bilateral	<5	<5	<5
	Unknown	<5	<5	<5
	Age (years)
	Median (LQ-UQ)	36 (29-47)	45 (35-56)	62 (53-68)
	Sex
	Male	49 (55.1%)	30 (51.7%)	171 (66.8%)	<0.05
	Female	40 (44.9%)	28 (48.3%)	85 (33.2%)
	Survival (months)
	mOS	84	143	16
	mPFS	40	41	9
	ECOG
	0	39 (43.8%)	20 (34.5%)	86 (33.6%)	>0.05
	1	23 (25.8%)	18 (31.0%)	94 (36.7%)
	2	0 (0.0%)	<5	22 (8.6%)
	3	0 (0.0%)	<5	<5
	4	0 (0.0%)	0 (0.0%)	<5
	Unknown	27 (30.3%)	18 (31.0%)	50 (19.5%)
	Molecular
	MGMT promoter
	Methylated	40 (44.9%)	14 (24.1%)	107 (41.8%)	<0.00001
	Unmethylated	12 (13.5%)	2 (3.4%)	116 (45.3%)
	Unknown	37 (41.57%)	42 (72.4%)	33 (12.9%)
	TERT promoter
	Wildtype	88 (98.9%)	3 (5.2%)	22 (8.6%)	<0.00001
	Mutant	1 (1.1%)	55 (94.8%)	234 (91.4%)
	TP53
	Wildtype	3 (3.37%)	57 (98.3%)	192 (75.0%)	<0.00001
	Mutant	86 (96.6%)	1 (1.72%)	64 (25.0%)
	ATRX
	Wildtype	25 (28.1%)	58 (100.0%)	254 (99.2%)	<0.00001
	Mutant	64 (71.9%)	0 (0.0%)	2 (0.8%)

## Sheet: ST2 - treatment and radiologica
	Supplementary Table 2: Post-operative treatment and radiological details
	Feature	Astrocytoma, IDH mutant (n=89)	Oligodendroglioma, IDH mutant, and 1p/19q co-deleted (n=58)	Glioblastoma, IDH wildtype (n=256)	P-value
	Clinical (n)
	Post-operative complication (within 30 days)	8 (9.0%)	11 (19.6%)	18 (7.0%)
	CSF diversion	<5	<5	5 (2.0%)
	Repeat surgery (recurrence/ progression)	14 (15.7%)	5 (8.9%)	40 (15.6%)
	STUPP regime
	Yes	<25	<5	79 (30.9%)	<0.005
	No	63 (70.8%)	52 (89.7%)	162 (63.3%)
	Unknown	<5	<5	15 (5.9%)
	Adjuvant chemotherapy (type)
	TMZ	42 (47.2%)	10 (17.9%)	149 (58.2%)	<0.00001
	PCV	<10	21 (37.5%)	6 (2.3%)
	Lomustine	0 (0.0%)	<5	11 (4.3%)
	Other/Unknown	<5	<10	15 (5.9%)
	None	39 (43.8%)	21 (37.5%)	75 (29.3%)
	Radiotherapy (type)
	Standard (50-60Gy)	46 (51.7%)	26 (46.4%)	162 (63.3%)	<0.00001
	Hypofractionated (30-45Gy)	<5	<5	42 (16.4%)
	Other (incl. WBRT)	<5	0 (0%)	<10
	None	37 (41.6%)	28 (50.0%)	42 (16.4%)
	Unknown	<5	<5	<5
	Radiological (n)
	Extent of Resection
	GTR	37 (41.6%)	22 (39.3%)	103 (40.2%)	>0.05
	SR	18 (20.2%)	18 (32.1%)	75 (29.3%)
	PR	<10	<5	<15
	Biopsy	<5	<5	<5
	Unknown	26 (29.2%)	14 (25.0%)	62 (24.2%)
	Radiological disease
	Progression	35 (39.3%)	22 (39.3%)	211 (82.4%)	<0.00001
	Stable	40 (44.9%)	26 (46.4%)	7 (2.7%)
	Unknown	14 (15.7%)	10 (17.9%)	38 (14.8%)

## Sheet: ST3 - sample QC overview
Supplementary Table 3: Summary of sample and tumour quality control steps
Starting with 580 fresh frozen tumours in the Genomics England v8 Adult Glioma release
	n starting		n excluded		n remaining
Quality control step	Tumour	Participant	Tumour	Participant	Tumour	Participant
1. Copy Number QC	580	575	49	48	531	527
2. Purity QC	531	527	35	34	496	493
3. Not diffuse glioma	496	491	93	93	403	400

## Sheet: ST4 - coding drivers identified
Supplementary Table 4: Identified protein-coding driver genes.
CGC: Cancer Gene Census; VUS: variant of unknown significance
* canonical mutations of the TERT promoter were also included
												IntOGen results																												All glioma (n=403)
												All glioma (n=403)							GBM (n=256)							Astrocytoma (n=89)							Oligodendroglioma (n=58)							Carrier frequencies						Mutation Frequencies
Gene	Locus	Cohorts	Driver categorisation	CGC_status	Consensus_role	Known_role	PanCancer_Role	OncoKB_Role	Bailey_2018_gene	IntOGen_gene	IntOGen_cohorts	Significant bidders	Stouffer Q	Stouffer Q (CGC)	Ranking	Role	Filter Status	Reasons For Filtering	Significant bidders	Stouffer Q	Stouffer Q (CGC)	Ranking	Role	Filter Status	Reasons For Filtering	Significant bidders	Stouffer Q	Stouffer Q (CGC)	Ranking	Role	Filter Status	Reasons For Filtering	Significant bidders	Stouffer Q	Stouffer Q (CGC)	Ranking	Role	Filter Status	Reasons For Filtering	n nonsyn	freq nonsyn	n nonsyn ONCOGENIC	freq nonsyn ONCOGENIC	n nonsyn VUS	freq nonsyn VUS	recurrent muts	n nonsyn	n nonsyn ONCOGENIC	n nonsyn VUS
ARID1A	1p36.11	DIFFUSE_GLIOMA_ALL_403;DIFFUSE_GLIOMA_PRIMARY_338;DIFFUSE_GLIOMA_RECURRENCE_65;OLIGODENDROGLIOMA_58;OLIGODENDROGLIOMA_PRIMARY_39;OLIGODENDROGLIOMA_RECURRENCE_19	Established driver in glioma	YES	TSG	LoF	LoF	TSG	YES	YES	ICGC_WXS_BLCA_CN;CBIOP_WXS_BLCA_BGI;CBIOP_WXS_BLCA_DFARBER_MSKCC_2014;PCAWG_WGS_BLADDER_TCC;TCGA_WXS_BLCA;HARTWIG_URINARY_TRACT;PEDCBIOP_WXS_BLY-PRY;CBIOP_WXS_BRCA_MBCPROJECT_2018_MET_TREAT;CBIOP_WXS_BRCA_MBCPROJECT_2018_MET_UNTREAT;ICGC_WXS_BRCA_UK;ICGC_WGS_BRCA_EU;PCAWG_WGS_BREAST_ADENOCA;TCGA_WXS_BRCA;HARTWIG_BREAST;TCGA_WXS_CESC;ICGC_WXS_BTCA_JP;PCAWG_WGS_BILIARY_ADENOCA;HARTWIG_BILIARY;CBIOP…	mutpanning	0.000451917	0.000140819	151	ambiguous	AUTOMATIC_PASS	PASS	NA	NA	NA	NA	NA	NA	NA	NA	NA	NA	NA	NA	NA	NA	combination	0.0126533	0.154186	20	ambiguous	AUTOMATIC_PASS	PASS	18	0.044665	8	0.0198511	10	0.0248139	p.Gln1334del (5)	27	8	19
ARID1B	6q25.3	ASTROCYTOMA_IDH_MUTANT_89;ASTROCYTOMA_IDH_MUTANT_PRIMARY_67;ASTROCYTOMA_IDH_MUTANT_RECURRENCE_22	Established driver in glioma	YES	TSG	LoF	LoF	TSG	NO	YES	TCGA_WXS_BLCA;ICGC_WXS_BRCA_UK;TCGA_WXS_COADREAD;CBIOP_WXS_DLBC_BROAD_2012;ICGC_WXS_LICA_FR_WXS;TCGA_WXS_LIHC;D_HGG;TCGA_WXS_LGG;PCAWG_WGS_LUNG_SCC;OTHER_WGS_PBCA_DE_MB;ICGC_WXS_PACA_CA_WXS;OTHER_WGS_PBCA_DE_PIA	NA	NA	NA	NA	NA	NA	NA	NA	NA	NA	NA	NA	NA	NA	combination	0.00840725	0.0840566	116	LoF	AUTOMATIC_PASS	PASS	NA	NA	NA	NA	NA	NA	NA	6	0.0148883	2	0.00496278	4	0.00992556		10	2	8
ARID2	12q12	ASTROCYTOMA_IDH_MUTANT_89;ASTROCYTOMA_IDH_MUTANT_PRIMARY_67;ASTROCYTOMA_IDH_MUTANT_RECURRENCE_22	Established driver in glioma	YES	TSG	LoF	LoF	TSG	YES	YES	TCGA_WXS_BLCA;ICGC_WXS_BTCA_JP;HARTWIG_BILIARY;CBIOP_WXS_SKCM_BROAD;ICGC_WGS_MELA_AU;TCGA_WXS_SKCM;HARTWIG_SKIN_MELANOMA;CBIOP_WXS_ESCA_BROAD;ICGC_WGS_ESAD_UK;HARTWIG_ESOPHAGUS;CBIOP_WXS_HCC_AMC_PRV;ICGC_WXS_LICA_FR_WXS;ICGC_WXS_LINC_JP_WXS;ICGC_WGS_LINC_JP_WGS;PCAWG_WGS_LIVER_HCC;TCGA_WXS_LIHC;HARTWIG_LIVER;TCGA_WXS_HNSC;TCGA_WXS_LGG;TCGA_WXS_LUAD;OTHER_WGS_PBCA_DE_MB;PEDCBIOP_WXS_MBL-WNT-PRY;HA…	NA	NA	NA	NA	NA	NA	NA	NA	NA	NA	NA	NA	NA	NA	combination	0.00565294	0.0417525	6	LoF	AUTOMATIC_PASS	PASS	NA	NA	NA	NA	NA	NA	NA	11	0.0272953	7	0.0173697	4	0.00992556		15	7	8
ATRX	Xq21.1	DIFFUSE_GLIOMA_ALL_403;DIFFUSE_GLIOMA_PRIMARY_338;DIFFUSE_GLIOMA_RECURRENCE_65;ASTROCYTOMA_IDH_MUTANT_89;ASTROCYTOMA_IDH_MUTANT_PRIMARY_67;ASTROCYTOMA_IDH_MUTANT_RECURRENCE_22	Established driver in glioma	YES	TSG	LoF	LoF	TSG	YES	YES	PEDCBIOP_WXS_ACC-PRY;TCGA_WXS_ACC;D_ACC;CBIOP_WXS_CLL_IUOPA_2015;ICGC_WXS_GBM_CN;TCGA_WXS_GBM;HARTWIG_NERVOUS_SYSTEM_GLIOBLASTOMA_MULTIFORME;PEDCBIOP_WXS_HGG-PRY;ICGC_WGS_LMS_FR;PCAWG_WGS_CNS_OLIGO;TCGA_WXS_LGG;OTHER_WXS_NBL_SCIENCE_COLOGNE_2018;TARGET_WGS_NBL_US;PEDCBIOP_WXS_OS-PRY;HARTWIG_BONESOFT_TISSUE;D_OS;M_OS;HARTWIG_OVARY;PCAWG_WGS_PANC_ENDOCRINE;OTHER_WGS_PBCA_DE_PIA;TCGA_WXS_SARC	oncodrivefml,dndscv,cbase,mutpanning	7.38257e-27	1.0502e-27	7	LoF	AUTOMATIC_PASS	PASS	NA	NA	NA	NA	NA	NA	NA	oncodrivefml,dndscv,cbase,mutpanning	2.4305e-27	3.94061e-27	3	LoF	AUTOMATIC_PASS	PASS	NA	NA	NA	NA	NA	NA	NA	75	0.186104	66	0.163772	9	0.0223325	p.Lys1423ArgfsTer67 (3)	85	68	17
BCOR	Xp11.4	DIFFUSE_GLIOMA_ALL_403;DIFFUSE_GLIOMA_PRIMARY_338;DIFFUSE_GLIOMA_RECURRENCE_65;OLIGODENDROGLIOMA_58;OLIGODENDROGLIOMA_PRIMARY_39;OLIGODENDROGLIOMA_RECURRENCE_19	Established driver in glioma	YES	TSG	LoF	LoF	TSG	YES	YES	TCGA_WXS_ACC;D_ALL;OTHER_WXS_AML_PRY_BEAT_2018;ICGC_WXS_BTCA_JP;CBIOP_WXS_CLL_IUOPA_2015;PCAWG_WGS_LYMPH_CLL;TCGA_WXS_COADREAD;ICGC_WGS_BOCA_FR_AD;TCGA_WXS_GBM;PCAWG_WGS_CNS_MEDULLO;PEDCBIOP_WXS_MBL-SHH-PRY;OTHER_WGS_PBCA_DE_PIA;TCGA_WXS_STAD;TCGA_WXS_THYM;PCAWG_WGS_UTERUS_ADENOCA;TCGA_WXS_UCEC;TCGA_WXS_UCS	combination	0.0111746	0.00965342	180	LoF	AUTOMATIC_PASS	PASS	NA	NA	NA	NA	NA	NA	NA	NA	NA	NA	NA	NA	NA	NA	combination	0.000640205	0.00386266	77	LoF	AUTOMATIC_PASS	PASS	13	0.0322581	8	0.0198511	5	0.0124069		16	8	8
BCORL1	Xq26.1	ASTROCYTOMA_IDH_MUTANT_89;ASTROCYTOMA_IDH_MUTANT_PRIMARY_67;ASTROCYTOMA_IDH_MUTANT_RECURRENCE_22	Known driver in other tumour types	YES	TSG	NA	LoF	TSG	NO	YES	PCAWG_WGS_COLORECT_ADENOCA;PEDCBIOP_WXS_HGG-PRY;OTHER_WXS_NBL_SCIENCE_COLOGNE_2018;PEDCBIOP_WXS_NBL-PRY;HARTWIG_BONESOFT_TISSUE;ICGC_WXS_PACA_AU_WXS	NA	NA	NA	NA	NA	NA	NA	NA	NA	NA	NA	NA	NA	NA	combination	0.0294187	0.313116	133	Act	AUTOMATIC_PASS	PASS	NA	NA	NA	NA	NA	NA	NA	7	0.0173697	2	0.00496278	5	0.0124069		10	2	8
BRAF	7q34	DIFFUSE_GLIOMA_ALL_403;DIFFUSE_GLIOMA_PRIMARY_338;DIFFUSE_GLIOMA_RECURRENCE_65;GBM_256;GBM_PRIMARY_232	Established driver in glioma	YES	Oncogene	Act	Act	Oncogene	YES	YES	ICGC_WXS_BLCA_CN;CBIOP_WXS_BLCA_BGI;HARTWIG_URINARY_TRACT;HARTWIG_BREAST;CBIOP_WXS_CLL_IUOPA_2015;PCAWG_WGS_LYMPH_CLL;CBIOP_WXS_SKCM_BROAD;ICGC_WGS_SKCA_BR;ICGC_WGS_MELA_AU;TCGA_WXS_SKCM;PCAWG_WGS_SKIN_MELANOMA;HARTWIG_SKIN_MELANOMA;D_CM;ICGC_WXS_COCA_CN_WXS_VARSCAN;ICGC_WXS_COCA_CN_WXS_TORRENT;TCGA_WXS_COADREAD;HARTWIG_COLONRECTUM;CBIOP_WXS_DLBCL_DFCI_2018;CBIOP_WXS_DLBC_BROAD_2012;ICGC_WXS_GBM_…	combination	8.8662e-06	1.4014e-06	20	Act	AUTOMATIC_PASS	PASS	combination	2.36398e-05	4.3082e-06	18	Act	AUTOMATIC_PASS	PASS	NA	NA	NA	NA	NA	NA	NA	NA	NA	NA	NA	NA	NA	NA	8	0.0198511	5	0.0124069	3	0.00744417	p.Val600Glu (3)	8	5	3
CDC73	1q31.2	OLIGODENDROGLIOMA_58;OLIGODENDROGLIOMA_PRIMARY_39;OLIGODENDROGLIOMA_RECURRENCE_19	Candidate glioma driver	YES	TSG	LoF	Act	TSG	NO	YES	CBIOP_WXS_LUAD_BROAD	NA	NA	NA	NA	NA	NA	NA	NA	NA	NA	NA	NA	NA	NA	NA	NA	NA	NA	NA	NA	NA	combination	0.00024303	0.0011178	8	Act	AUTOMATIC_PASS	PASS	8	0.0198511	1	0.00248139	7	0.0173697		8	1	7
CDKN2A	9p21.3	DIFFUSE_GLIOMA_ALL_403;DIFFUSE_GLIOMA_PRIMARY_338;DIFFUSE_GLIOMA_RECURRENCE_65;GBM_256;GBM_PRIMARY_232	Established driver in glioma	YES	TSG	LoF	LoF	TSG	YES	YES	CBIOP_WXS_ACY_2019;TCGA_WXS_BLCA;HARTWIG_URINARY_TRACT;ICGC_WGS_BRCA_EU;PCAWG_WGS_BREAST_ADENOCA;HARTWIG_BREAST;ICGC_WXS_BTCA_JP;TCGA_WXS_CHOL;HARTWIG_BILIARY;CBIOP_WXS_SKCM_BROAD;ICGC_WGS_MELA_AU;TCGA_WXS_SKCM;PCAWG_WGS_SKIN_MELANOMA;HARTWIG_SKIN_MELANOMA;D_CM;CBIOP_WXS_ESCA_BROAD;PCAWG_WGS_ESO_ADENOCA;ICGC_WXS_ESCA_CN_WXS;ICGC_WGS_ESAD_UK;TCGA_WXS_ESCA;HARTWIG_ESOPHAGUS;TCGA_WXS_GBM;ICGC_WXS_LI…	oncodrivefml,dndscv,cbase,mutpanning	6.14592e-18	8.74283e-19	11	LoF	AUTOMATIC_PASS	PASS	oncodrivefml,dndscv,cbase,mutpanning	1.85107e-12	3.65458e-13	8	LoF	AUTOMATIC_PASS	PASS	NA	NA	NA	NA	NA	NA	NA	NA	NA	NA	NA	NA	NA	NA	10	0.0248139	9	0.0223325	1	0.00248139		15	10	5
CDKN2C	1p32.3	DIFFUSE_GLIOMA_ALL_403;DIFFUSE_GLIOMA_PRIMARY_338;DIFFUSE_GLIOMA_RECURRENCE_65	Established driver in glioma	YES	TSG	LoF	LoF	TSG	YES	YES	PEDCBIOP_WXS_HGG-PRY;TCGA_WXS_LGG	dndscv	2.31258e-05	3.63603e-06	30	Act	AUTOMATIC_PASS	PASS	NA	NA	NA	NA	NA	NA	NA	NA	NA	NA	NA	NA	NA	NA	NA	NA	NA	NA	NA	NA	NA	6	0.0148883	1	0.00248139	5	0.0124069		6	1	5
CIC	19q13.2	DIFFUSE_GLIOMA_ALL_403;DIFFUSE_GLIOMA_PRIMARY_338;DIFFUSE_GLIOMA_RECURRENCE_65;OLIGODENDROGLIOMA_58;OLIGODENDROGLIOMA_PRIMARY_39;OLIGODENDROGLIOMA_RECURRENCE_19	Established driver in glioma	YES	TSG	LoF	LoF	TSG	YES	YES	PCAWG_WGS_CNS_OLIGO;TCGA_WXS_LGG;TCGA_WXS_LUAD	oncodrivefml,dndscv,smregions,cbase,mutpanning	7.2017e-42	1.02447e-42	3	LoF	AUTOMATIC_PASS	PASS	NA	NA	NA	NA	NA	NA	NA	NA	NA	NA	NA	NA	NA	NA	oncodrivefml,oncodriveclustl,dndscv,smregions,cbase,mutpanning	1.81098e-37	6.81501e-37	2	LoF	AUTOMATIC_PASS	PASS	43	0.1067	35	0.0868486	8	0.0198511	p.Arg1214Ter (4);p.Arg215Gln (3)	53	42	11
COL3A1	2q32.2	DIFFUSE_GLIOMA_ALL_403;DIFFUSE_GLIOMA_PRIMARY_338;DIFFUSE_GLIOMA_RECURRENCE_65;GBM_256;GBM_PRIMARY_232	Candidate glioma driver	YES	TSG	NA	ambiguous	NA	NO	NO	NONE	cbase	0.000947779	0.000375165	172	LoF	AUTOMATIC_PASS	PASS	combination	0.0222254	0.0195266	150	LoF	AUTOMATIC_PASS	PASS	NA	NA	NA	NA	NA	NA	NA	NA	NA	NA	NA	NA	NA	NA	18	0.044665	4	0.00992556	14	0.0347395		26	5	21
CREBBP	16p13.3	GBM_256;GBM_PRIMARY_232	Known driver in other tumour types	YES	TSG	LoF	LoF	TSG	YES	YES	D_ALL;ICGC_WXS_BLCA_CN;CBIOP_WXS_BLCA_BGI;CBIOP_WXS_BLCA_DFARBER_MSKCC_2014;TCGA_WXS_BLCA;HARTWIG_URINARY_TRACT;CBIOP_WXS_BRCA_MBCPROJECT_2018_MET_TREAT;TCGA_WXS_BRCA;CBIOP_WXS_CLL_IUOPA_2015;PCAWG_WGS_LYMPH_CLL;CBIOP_WXS_DLBCL_DFCI_2018;CBIOP_WXS_DLBC_BROAD_2012;OTHER_WGS_DLBCL_NATCOM_2018;TCGA_WXS_DLBC;ICGC_WGS_ESCA_CN_WGS;ICGC_WXS_ESCA_CN_WXS;CBIOP_WXS_HCC_AMC_PRV;CBIOP_WXS_HNSC_BROAD;TCGA_WXS…	NA	NA	NA	NA	NA	NA	NA	combination	0.000930736	0.000237802	27	LoF	AUTOMATIC_PASS	PASS	NA	NA	NA	NA	NA	NA	NA	NA	NA	NA	NA	NA	NA	NA	16	0.0397022	6	0.0148883	10	0.0248139		26	6	20
EGFR	7p11.2	DIFFUSE_GLIOMA_ALL_403;DIFFUSE_GLIOMA_PRIMARY_338;DIFFUSE_GLIOMA_RECURRENCE_65;GBM_256;GBM_PRIMARY_232	Established driver in glioma	YES	Oncogene	Act	Act	Oncogene	YES	YES	CBIOP_WXS_BRCA_MBCPROJECT_2018_MET_UNTREAT;HARTWIG_COLONRECTUM;ICGC_WXS_GBM_CN;PCAWG_WGS_CNS_GBM;TCGA_WXS_GBM;HARTWIG_NERVOUS_SYSTEM_GLIOBLASTOMA_MULTIFORME;PEDCBIOP_WXS_HGG-PRY;TCGA_WXS_LGG;CBIOP_WXS_LUAD_BROAD;PCAWG_WGS_LUNG_ADENOCA;TCGA_WXS_LUAD;CBIOP_WXS_MM_BROAD_UNTREAT;HARTWIG_LUNG_NON_SMALL_CELL;OTHER_WGS_PBCA_DE_PIA	oncodrivefml,oncodriveclustl,dndscv,smregions,cbase,mutpanning,hotmaps	4.50297e-45	6.40567e-46	4	Act	AUTOMATIC_PASS	PASS	oncodrivefml,oncodriveclustl,dndscv,smregions,cbase,mutpanning,hotmaps	5.67201e-40	1.11983e-40	1	Act	AUTOMATIC_PASS	PASS	NA	NA	NA	NA	NA	NA	NA	NA	NA	NA	NA	NA	NA	NA	53	0.131514	42	0.104218	11	0.0272953	p.Ala289Val (13);p.Gly598Val (11);p.Arg108Lys (3);p.Ala289Asp (3);p.Ala289Thr (3);p.Arg222Cys (3);p.Pro596Leu (3)	71	49	22
FUBP1	1p31.1	DIFFUSE_GLIOMA_ALL_403;DIFFUSE_GLIOMA_PRIMARY_338;DIFFUSE_GLIOMA_RECURRENCE_65;OLIGODENDROGLIOMA_58;OLIGODENDROGLIOMA_PRIMARY_39;OLIGODENDROGLIOMA_RECURRENCE_19	Established driver in glioma	YES	TSG	LoF	LoF	TSG	YES	YES	CBIOP_WXS_CLL_IUOPA_2015;PCAWG_WGS_CNS_OLIGO;TCGA_WXS_LGG	oncodrivefml,dndscv,cbase,mutpanning	9.82927e-17	1.39826e-17	11	LoF	AUTOMATIC_PASS	PASS	NA	NA	NA	NA	NA	NA	NA	NA	NA	NA	NA	NA	NA	NA	oncodrivefml,dndscv,cbase,mutpanning	6.67667e-21	2.51254e-20	3	LoF	AUTOMATIC_PASS	PASS	19	0.0471464	12	0.0297767	7	0.0173697		20	13	7
IDH1	2q34	DIFFUSE_GLIOMA_ALL_403;DIFFUSE_GLIOMA_PRIMARY_338;DIFFUSE_GLIOMA_RECURRENCE_65;ASTROCYTOMA_IDH_MUTANT_89;ASTROCYTOMA_IDH_MUTANT_PRIMARY_67;ASTROCYTOMA_IDH_MUTANT_RECURRENCE_22;OLIGODENDROGLIOMA_58;OLIGODENDROGLIOMA_PRIMARY_39;OLIGODENDROGLIOMA_RECURRENCE_19	Established driver in glioma	YES	Oncogene	Act	Act	Oncogene	YES	YES	ICGC_WXS_LAML_KR_MUTECT;OTHER_WXS_AML_PRY_BEAT_2018;ICGC_WXS_LAML_KR_VARSCAN;TCGA_WXS_LAML;ICGC_WXS_BTCA_JP;TCGA_WXS_CHOL;HARTWIG_BILIARY;TCGA_WXS_SKCM;HARTWIG_SKIN_MELANOMA;ICGC_WXS_GBM_CN;PCAWG_WGS_CNS_GBM;TCGA_WXS_GBM;HARTWIG_NERVOUS_SYSTEM_GLIOBLASTOMA_MULTIFORME;PCAWG_WGS_LIVER_HCC;TCGA_WXS_LIHC;HARTWIG_LIVER;PEDCBIOP_WXS_HGG-PRY;PCAWG_WGS_CNS_OLIGO;TCGA_WXS_LGG;PCAWG_WGS_CNS_MEDULLO;OTHER_W…	oncodrivefml,oncodriveclustl,dndscv,smregions,cbase,mutpanning,hotmaps	1.1688e-49	1.66267e-50	2	Act	AUTOMATIC_PASS	PASS	NA	NA	NA	NA	NA	NA	NA	oncodrivefml,oncodriveclustl,dndscv,smregions,cbase,mutpanning,hotmaps	8.19578e-50	1.32879e-49	1	Act	AUTOMATIC_PASS	PASS	oncodriveclustl,dndscv,smregions,cbase,mutpanning,hotmaps	2.60684e-44	9.80996e-44	1	Act	AUTOMATIC_PASS	PASS	143	0.354839	141	0.349876	2	0.00496278	p.Arg132Cys (8);p.Arg132His (122);p.Arg132Ser (6);p.Arg132Gly (4)	145	141	4
IDH2	15q26.1	DIFFUSE_GLIOMA_ALL_403;DIFFUSE_GLIOMA_PRIMARY_338;DIFFUSE_GLIOMA_RECURRENCE_65;ASTROCYTOMA_IDH_MUTANT_89;ASTROCYTOMA_IDH_MUTANT_PRIMARY_67;ASTROCYTOMA_IDH_MUTANT_RECURRENCE_22;OLIGODENDROGLIOMA_58;OLIGODENDROGLIOMA_PRIMARY_39;OLIGODENDROGLIOMA_RECURRENCE_19	Established driver in glioma	YES	Oncogene	Act	Act	Oncogene	YES	YES	OTHER_WXS_AML_PRY_BEAT_2018;ICGC_WXS_LAML_KR_VARSCAN;TCGA_WXS_LAML;CBIOP_WXS_BLCA_DFARBER_MSKCC_2014;ICGC_WXS_BTCA_JP;TCGA_WXS_CHOL;TCGA_WXS_LGG;ICGC_WXS_BOCA_UK	mutpanning,hotmaps	7.17809e-10	1.02112e-10	16	Act	AUTOMATIC_PASS	PASS	NA	NA	NA	NA	NA	NA	NA	combination	0.00143165	0.00563711	34	Act	AUTOMATIC_PASS	PASS	dndscv,hotmaps	5.18885e-13	2.44081e-12	4	Act	AUTOMATIC_PASS	PASS	8	0.0198511	6	0.0148883	2	0.00496278	p.Arg172Lys (3)	8	6	2
KRAS	12p12.1	DIFFUSE_GLIOMA_ALL_403;DIFFUSE_GLIOMA_PRIMARY_338;DIFFUSE_GLIOMA_RECURRENCE_65	Established driver in glioma	YES	Oncogene	Act	Act	Oncogene	YES	YES	PEDCBIOP_WXS_BALL-PRY;PEDCBIOP_WXS_BALL-REL;D_ALL;OTHER_WXS_AML_PRY_BEAT_2018;PEDCBIOP_WXS_AML-PRY;TCGA_WXS_LAML;D_AML;HARTWIG_ANUS;HARTWIG_SMALL_INTESTINE;HARTWIG_NET_SMALL_INTESTINAL;ICGC_WXS_BLCA_CN;CBIOP_WXS_BLCA_BGI;TCGA_WXS_BLCA;TCGA_WXS_BRCA;HARTWIG_BREAST;TCGA_WXS_CESC;ICGC_WXS_BTCA_JP;TCGA_WXS_CHOL;PCAWG_WGS_BILIARY_ADENOCA;HARTWIG_BILIARY;CBIOP_WXS_CLL_IUOPA_2015;CBIOP_WXS_CLL_BROAD_201…	combination	0.0339225	0.0446954	52	Act	AUTOMATIC_PASS	PASS	NA	NA	NA	NA	NA	NA	NA	NA	NA	NA	NA	NA	NA	NA	NA	NA	NA	NA	NA	NA	NA	4	0.00992556	3	0.00744417	1	0.00248139		4	3	1
LZTR1	22q11.21	GBM_256;GBM_PRIMARY_232	Established driver in glioma	YES	TSG	NA	LoF	TSG	NO	YES	D_ALL;TCGA_WXS_GBM;ICGC_WXS_PACA_AU_WXS;CBIOP_WXS_PRAD_MSKCC_DCFI_2018_PRY;TCGA_WXS_UCEC	NA	NA	NA	NA	NA	NA	NA	combination	0.000839486	0.000217534	25	LoF	AUTOMATIC_PASS	PASS	NA	NA	NA	NA	NA	NA	NA	NA	NA	NA	NA	NA	NA	NA	8	0.0198511	2	0.00496278	6	0.0148883		13	2	11
NF1	17q11.2	DIFFUSE_GLIOMA_ALL_403;DIFFUSE_GLIOMA_PRIMARY_338;DIFFUSE_GLIOMA_RECURRENCE_65;GBM_256;GBM_PRIMARY_232;ASTROCYTOMA_IDH_MUTANT_89;ASTROCYTOMA_IDH_MUTANT_PRIMARY_67;ASTROCYTOMA_IDH_MUTANT_RECURRENCE_22	Established driver in glioma	YES	TSG	LoF	LoF	TSG	YES	YES	TCGA_WXS_ACC;PEDCBIOP_WXS_BALL-REL;D_ALL;OTHER_WXS_AML_PRY_BEAT_2018;TCGA_WXS_LAML;ICGC_WXS_BLCA_CN;CBIOP_WXS_BLCA_BGI;PCAWG_WGS_BLADDER_TCC;CBIOP_WXS_BRCA_MBCPROJECT_2018_MET_UNTREAT;ICGC_WGS_BRCA_EU;TCGA_WXS_BRCA;HARTWIG_BREAST;ICGC_WXS_BTCA_JP;HARTWIG_BILIARY;ICGC_WGS_MELA_AU;TCGA_WXS_SKCM;PCAWG_WGS_SKIN_MELANOMA;HARTWIG_SKIN_MELANOMA;HARTWIG_COLONRECTUM;PCAWG_WGS_CNS_GBM;TCGA_WXS_GBM;HARTWIG_…	oncodrivefml,dndscv,cbase,mutpanning	1.06131e-22	1.50977e-23	8	LoF	AUTOMATIC_PASS	PASS	oncodrivefml,dndscv,cbase,mutpanning	2.82109e-22	5.5697e-23	4	LoF	AUTOMATIC_PASS	PASS	cbase,mutpanning	0.000617324	0.00229007	6	LoF	AUTOMATIC_PASS	PASS	NA	NA	NA	NA	NA	NA	NA	48	0.119107	39	0.0967742	9	0.0223325	p.Ile679AspfsTer21 (3)	81	51	30
NOTCH1	9q34.3	DIFFUSE_GLIOMA_ALL_403;DIFFUSE_GLIOMA_PRIMARY_338;DIFFUSE_GLIOMA_RECURRENCE_65;OLIGODENDROGLIOMA_58;OLIGODENDROGLIOMA_PRIMARY_39;OLIGODENDROGLIOMA_RECURRENCE_19	Established driver in glioma	YES	ambiguous	ambiguous	LoF	Oncogene;TSG	YES	YES	D_ALL;TCGA_WXS_CESC;CBIOP_WXS_CLL_IUOPA_2015;CBIOP_WXS_CLL_BROAD_2013;CBIOP_WXS_DLBC_BROAD_2012;CBIOP_WXS_ESCA_BROAD;ICGC_WXS_ESCA_CN_WXS;TCGA_WXS_ESCA;PCAWG_WGS_HEAD_SCC;CBIOP_WXS_HNSC_BROAD;TCGA_WXS_HNSC;HARTWIG_HEAD_AND_NECK;TCGA_WXS_LGG;PCAWG_WGS_LUNG_SCC;TCGA_WXS_LUSC;PEDCBIOP_WXS_MBL-GP4-PRY;TCGA_WXS_TGCT;HARTWIG_LUNG_NON_SMALL_CELL;HARTWIG_OVARY;CBIOP_WXS_BCC_UNIGE_2016_UNTREAT;CBIOP_WXS_S…	cbase,mutpanning	6.75493e-06	1.07397e-06	18	LoF	AUTOMATIC_PASS	PASS	NA	NA	NA	NA	NA	NA	NA	NA	NA	NA	NA	NA	NA	NA	oncodrivefml,smregions,cbase	1.55125e-10	7.00512e-10	6	LoF	AUTOMATIC_PASS	PASS	20	0.0496278	7	0.0173697	13	0.0322581		30	8	22
PBRM1	3p21.1	OLIGODENDROGLIOMA_58;OLIGODENDROGLIOMA_PRIMARY_39;OLIGODENDROGLIOMA_RECURRENCE_19	Known driver in other tumour types	YES	TSG	LoF	LoF	TSG	YES	YES	HARTWIG_UTERUS_CERVICAL;ICGC_WXS_BTCA_JP;TCGA_WXS_CHOL;HARTWIG_BILIARY;TCGA_WXS_SKCM;HARTWIG_SKIN_MELANOMA;CBIOP_WXS_ESCA_BROAD;ICGC_WXS_ESCA_CN_WXS;CBIOP_WXS_LUAD_BROAD;TCGA_WXS_KIRC;HARTWIG_KIDNEY_RENAL_CELL;TCGA_WXS_KIRP;TCGA_WXS_UCEC	NA	NA	NA	NA	NA	NA	NA	NA	NA	NA	NA	NA	NA	NA	NA	NA	NA	NA	NA	NA	NA	combination	0.00509367	0.0536712	77	Act	AUTOMATIC_PASS	PASS	5	0.0124069	2	0.00496278	3	0.00744417		8	3	5
PDGFRA	4q12	DIFFUSE_GLIOMA_ALL_403;DIFFUSE_GLIOMA_PRIMARY_338;DIFFUSE_GLIOMA_RECURRENCE_65;GBM_256;GBM_PRIMARY_232	Established driver in glioma	YES	Oncogene	Act	Act	Oncogene	NO	YES	ICGC_WXS_GBM_CN;HARTWIG_NERVOUS_SYSTEM_GLIOBLASTOMA_MULTIFORME;PEDCBIOP_WXS_HGG-PRY;D_HGG;TCGA_WXS_LGG;ICGC_WGS_LUSC_KR_WGS;OTHER_WGS_PBCA_DE_PIA	dndscv,smregions,mutpanning	2.13158e-09	3.03227e-10	17	Act	AUTOMATIC_PASS	PASS	dndscv,smregions,mutpanning	8.94911e-09	1.76683e-09	11	Act	AUTOMATIC_PASS	PASS	NA	NA	NA	NA	NA	NA	NA	NA	NA	NA	NA	NA	NA	NA	14	0.0347395	8	0.0198511	6	0.0148883	p.Glu229Lys (3)	22	10	12
PIK3CA	3q26.32	DIFFUSE_GLIOMA_ALL_403;DIFFUSE_GLIOMA_PRIMARY_338;DIFFUSE_GLIOMA_RECURRENCE_65;GBM_256;GBM_PRIMARY_232;ASTROCYTOMA_IDH_MUTANT_89;ASTROCYTOMA_IDH_MUTANT_PRIMARY_67;ASTROCYTOMA_IDH_MUTANT_RECURRENCE_22	Established driver in glioma	YES	Oncogene	Act	Act	Oncogene	YES	YES	CBIOP_WXS_ACY_2019;HARTWIG_ANUS;CBIOP_WXS_ANGS_PAINTER_2018_UNTREAT;ICGC_WXS_BLCA_CN;CBIOP_WXS_BLCA_BGI;CBIOP_WXS_BLCA_DFARBER_MSKCC_2014;TCGA_WXS_BLCA;HARTWIG_URINARY_TRACT;CBIOP_WXS_BRCA_MBCPROJECT_2018_MET_TREAT;ICGC_WGS_BRCA_FR;PCAWG_WGS_BREAST_LOBULARCA;CBIOP_WXS_BRCA_MBCPROJECT_2018_PRY_UNTREAT;CBIOP_WXS_BRCA_MBCPROJECT_2018_MET_UNTREAT;ICGC_WXS_BRCA_KR;ICGC_WXS_BRCA_UK;ICGC_WGS_BRCA_EU;PCA…	oncodriveclustl,dndscv,cbase,mutpanning,hotmaps	5.96618e-31	8.48715e-32	5	Act	AUTOMATIC_PASS	PASS	dndscv,cbase,mutpanning,hotmaps	2.39942e-18	4.73721e-19	7	Act	AUTOMATIC_PASS	PASS	mutpanning,hotmaps	9.94657e-05	0.000258024	4	Act	AUTOMATIC_PASS	PASS	NA	NA	NA	NA	NA	NA	NA	46	0.114144	41	0.101737	5	0.0124069	p.Arg88Gln (5);p.Glu545Lys (4);p.Gly118Asp (5)	51	43	8
PIK3CB	3q22.3	DIFFUSE_GLIOMA_ALL_403;DIFFUSE_GLIOMA_PRIMARY_338;DIFFUSE_GLIOMA_RECURRENCE_65;GBM_256;GBM_PRIMARY_232	Established driver in glioma	YES	Oncogene	Act	ambiguous	Oncogene	YES	YES	TCGA_WXS_BLCA;ICGC_WXS_GBM_CN;TCGA_WXS_GBM;CBIOP_WXS_PRAD_MSKCC_DCFI_2018_MET;CBIOP_WXS_PRAD_SU2C_2019	hotmaps	0.00250675	0.00130752	52	Act	AUTOMATIC_PASS	PASS	combination	0.0955507	0.158686	103	Act	AUTOMATIC_PASS	PASS	NA	NA	NA	NA	NA	NA	NA	NA	NA	NA	NA	NA	NA	NA	8	0.0198511	3	0.00744417	5	0.0124069		10	3	7
PIK3R1	5q13.1	DIFFUSE_GLIOMA_ALL_403;DIFFUSE_GLIOMA_PRIMARY_338;DIFFUSE_GLIOMA_RECURRENCE_65;GBM_256;GBM_PRIMARY_232;OLIGODENDROGLIOMA_58;OLIGODENDROGLIOMA_PRIMARY_39;OLIGODENDROGLIOMA_RECURRENCE_19	Established driver in glioma	YES	TSG	LoF	LoF	TSG	YES	YES	CBIOP_WXS_ACY_2019;ICGC_WGS_BRCA_EU;TCGA_WXS_BRCA;HARTWIG_BREAST;ICGC_WXS_BTCA_JP;TCGA_WXS_GBM;HARTWIG_NERVOUS_SYSTEM_GLIOBLASTOMA_MULTIFORME;CBIOP_WXS_HNSC_BROAD;TCGA_WXS_LGG;HARTWIG_BONESOFT_TISSUE;CBIOP_WXS_EGC_TMUCIH_2015;PCAWG_WGS_UTERUS_ADENOCA;TCGA_WXS_UCEC;TCGA_WXS_UCS	oncodrivefml,dndscv,cbase,mutpanning	1.00987e-18	1.43659e-19	10	LoF	AUTOMATIC_PASS	PASS	dndscv,cbase,mutpanning	2.68491e-11	5.30084e-12	8	LoF	AUTOMATIC_PASS	PASS	NA	NA	NA	NA	NA	NA	NA	combination	1.26579e-05	6.35114e-05	7	Act	AUTOMATIC_PASS	PASS	31	0.0769231	24	0.0595533	7	0.0173697	p.Gly376Arg (4)	31	24	7
PPM1D	17q23.2	GBM_256;GBM_PRIMARY_232	Known driver in other tumour types	YES	Oncogene	LoF	LoF	Oncogene	NO	YES	PEDCBIOP_WXS_HGG-PRY;OTHER_WGS_PBCA_DE_PIA;CBIOP_WXS_BCC_UNIGE_2016_UNTREAT	NA	NA	NA	NA	NA	NA	NA	combination	0.000717126	0.000169899	27	LoF	AUTOMATIC_PASS	PASS	NA	NA	NA	NA	NA	NA	NA	NA	NA	NA	NA	NA	NA	NA	6	0.0148883	3	0.00744417	3	0.00744417		8	3	5
PTEN	10q23.31	DIFFUSE_GLIOMA_ALL_403;DIFFUSE_GLIOMA_PRIMARY_338;DIFFUSE_GLIOMA_RECURRENCE_65;GBM_256;GBM_PRIMARY_232	Established driver in glioma	YES	TSG	LoF	LoF	TSG	YES	YES	TCGA_WXS_BLCA;CBIOP_WXS_BRCA_MBCPROJECT_2018_MET_UNTREAT;ICGC_WXS_BRCA_UK;ICGC_WGS_BRCA_EU;PCAWG_WGS_BREAST_ADENOCA;TCGA_WXS_BRCA;HARTWIG_BREAST;TCGA_WXS_CESC;ICGC_WXS_BTCA_JP;PCAWG_WGS_BILIARY_ADENOCA;CBIOP_WXS_SKCM_BROAD;TCGA_WXS_SKCM;PCAWG_WGS_SKIN_MELANOMA;HARTWIG_SKIN_MELANOMA;ICGC_WXS_COCA_CN_WXS_VARSCAN;ICGC_WXS_COCA_CN_WXS_TORRENT;TCGA_WXS_COADREAD;HARTWIG_COLONRECTUM;ICGC_WXS_ESCA_CN_WXS…	oncodrivefml,dndscv,cbase,mutpanning,hotmaps	7.95462e-34	1.13158e-34	6	LoF	AUTOMATIC_PASS	PASS	oncodrivefml,dndscv,cbase,mutpanning,hotmaps	2.65229e-26	5.23644e-27	3	LoF	AUTOMATIC_PASS	PASS	NA	NA	NA	NA	NA	NA	NA	NA	NA	NA	NA	NA	NA	NA	100	0.248139	79	0.19603	21	0.0521092	p.Arg335Ter (5);p.Arg233Ter (6)	108	80	28
PTPN11	12q24.13	DIFFUSE_GLIOMA_ALL_403;DIFFUSE_GLIOMA_PRIMARY_338;DIFFUSE_GLIOMA_RECURRENCE_65;GBM_256;GBM_PRIMARY_232	Established driver in glioma	YES	Oncogene	Act	Act	Oncogene	YES	YES	D_ALL;ICGC_WXS_LAML_KR_MUTECT;OTHER_WXS_AML_PRY_BEAT_2018;TCGA_WXS_LAML;CBIOP_WXS_CLL_IUOPA_2015;TCGA_WXS_COADREAD;TCGA_WXS_GBM;TCGA_WXS_LGG;CBIOP_WXS_MM_BROAD_UNTREAT;OTHER_WGS_MM_NATLEUK2018;TARGET_WGS_NBL_US;PCAWG_WGS_CNS_PILOASTRO;OTHER_WGS_PBCA_DE_PIA;PEDCBIOP_WXS_PIA-PRY	oncodrivefml,dndscv,cbase,mutpanning,hotmaps	1.14775e-19	1.63272e-20	11	Act	AUTOMATIC_PASS	PASS	oncodrivefml,dndscv,cbase,mutpanning,hotmaps	1.67839e-14	3.31365e-15	6	Act	AUTOMATIC_PASS	PASS	NA	NA	NA	NA	NA	NA	NA	NA	NA	NA	NA	NA	NA	NA	17	0.0421836	14	0.0347395	3	0.00744417	p.Gly507Val (3);p.Ser506Leu (3)	19	14	5
RB1	13q14.2	DIFFUSE_GLIOMA_ALL_403;DIFFUSE_GLIOMA_PRIMARY_338;DIFFUSE_GLIOMA_RECURRENCE_65;GBM_256;GBM_PRIMARY_232	Established driver in glioma	YES	TSG	LoF	LoF	TSG	YES	YES	TCGA_WXS_ACC;ICGC_WXS_BLCA_CN;CBIOP_WXS_BLCA_BGI;CBIOP_WXS_BLCA_DFARBER_MSKCC_2014;PCAWG_WGS_BLADDER_TCC;TCGA_WXS_BLCA;HARTWIG_URINARY_TRACT;ICGC_WGS_BRCA_EU;PCAWG_WGS_BREAST_ADENOCA;TCGA_WXS_BRCA;HARTWIG_BREAST;TCGA_WXS_CESC;TCGA_WXS_SKCM;PCAWG_WGS_SKIN_MELANOMA;HARTWIG_SKIN_MELANOMA;ICGC_WXS_ESCA_CN_WXS;ICGC_WGS_ESAD_UK;TCGA_WXS_ESCA;PCAWG_WGS_CNS_GBM;TCGA_WXS_GBM;HARTWIG_NERVOUS_SYSTEM_GLIOBLA…	dndscv,cbase,mutpanning	3.6124e-20	5.13879e-21	8	LoF	AUTOMATIC_PASS	PASS	dndscv,cbase,mutpanning	1.04891e-15	2.07087e-16	10	LoF	AUTOMATIC_PASS	PASS	NA	NA	NA	NA	NA	NA	NA	NA	NA	NA	NA	NA	NA	NA	37	0.0918114	31	0.0769231	6	0.0148883		40	32	8
SALL3	18q23	ASTROCYTOMA_IDH_MUTANT_89;ASTROCYTOMA_IDH_MUTANT_PRIMARY_67;ASTROCYTOMA_IDH_MUTANT_RECURRENCE_22	Candidate glioma driver	NO	TSG	NA	ambiguous	NA	NO	NO	NONE	NA	NA	NA	NA	NA	NA	NA	NA	NA	NA	NA	NA	NA	NA	cbase,mutpanning	6.06173e-05		96	LoF	AUTOMATIC_PASS	PASS	NA	NA	NA	NA	NA	NA	NA	8	0.0198511	2	0.00496278	6	0.0148883		13	2	11
SETD1B	12q24.31	GBM_256;GBM_PRIMARY_232	Known driver in other tumour types	YES	TSG	NA	LoF	Unknown	NO	YES	ICGC_WXS_ESCA_CN_WXS;PCAWG_WGS_OVARY_ADENOCA;ICGC_WXS_PACA_AU_WXS	NA	NA	NA	NA	NA	NA	NA	combination	0.000177207	3.99842e-05	12	Act	AUTOMATIC_PASS	PASS	NA	NA	NA	NA	NA	NA	NA	NA	NA	NA	NA	NA	NA	NA	14	0.0347395	4	0.00992556	10	0.0248139		31	4	27
SETD2	3p21.31	GBM_256;GBM_PRIMARY_232	Established driver in glioma	YES	TSG	LoF	LoF	TSG	YES	YES	D_ALL;PCAWG_WGS_BLADDER_TCC;CBIOP_WXS_CLL_IUOPA_2015;PCAWG_WGS_LYMPH_CLL;TCGA_WXS_SKCM;HARTWIG_SKIN_MELANOMA;PEDCBIOP_WGS_ES_IOCURIE_2014;ICGC_WXS_LICA_CN;TCGA_WXS_LGG;TCGA_WXS_LUAD;TCGA_WXS_MESO;OTHER_WGS_MM_NATLEUK2018;HARTWIG_LUNG_NON_SMALL_CELL;HARTWIG_BONESOFT_TISSUE;ICGC_WXS_PACA_AU_WXS;PCAWG_WGS_PANC_ENDOCRINE;HARTWIG_NET_PANCREATIC;PCAWG_WGS_CNS_PILOASTRO;PEDCBIOP_WXS_PIA-PRY;PCAWG_WGS_PR…	NA	NA	NA	NA	NA	NA	NA	combination	0.00174097	0.000439199	81	LoF	AUTOMATIC_PASS	PASS	NA	NA	NA	NA	NA	NA	NA	NA	NA	NA	NA	NA	NA	NA	13	0.0322581	11	0.0272953	2	0.00496278		27	15	12
SFPQ	1p34.3	DIFFUSE_GLIOMA_ALL_403;DIFFUSE_GLIOMA_PRIMARY_338;DIFFUSE_GLIOMA_RECURRENCE_65	Candidate glioma driver	YES	TSG	Act	LoF	NA	NO	NO	NONE	smregions	0.000988977	0.000391475	90	Act	AUTOMATIC_PASS		NA	NA	NA	NA	NA	NA	NA	NA	NA	NA	NA	NA	NA	NA	NA	NA	NA	NA	NA	NA	NA	5	0.0124069	0	0	5	0.0124069		7	0	7
SMARCA4	19p13.2	ASTROCYTOMA_IDH_MUTANT_89;ASTROCYTOMA_IDH_MUTANT_PRIMARY_67;ASTROCYTOMA_IDH_MUTANT_RECURRENCE_22;OLIGODENDROGLIOMA_58;OLIGODENDROGLIOMA_PRIMARY_39;OLIGODENDROGLIOMA_RECURRENCE_19	Established driver in glioma	YES	TSG	LoF	LoF	TSG	YES	YES	CBIOP_WXS_BLCA_BGI;HARTWIG_URINARY_TRACT;PEDCBIOP_WXS_BLY-PRY;TCGA_WXS_COADREAD;CBIOP_WXS_ESCA_BROAD;PCAWG_WGS_ESO_ADENOCA;ICGC_WGS_ESAD_UK;TCGA_WXS_ESCA;TCGA_WXS_LIHC;HARTWIG_HEAD_AND_NECK;TCGA_WXS_LGG;CBIOP_WXS_LUAD_BROAD;TCGA_WXS_LUAD;PCAWG_WGS_CNS_MEDULLO;OTHER_WGS_PBCA_DE_MB;PEDCBIOP_WXS_MBL-WNT-PRY;PEDCBIOP_WXS_MBL-GP3-PRY;PEDCBIOP_WXS_MBL_BROAD_2012;PCAWG_WGS_LYMPH_BNHL;HARTWIG_LUNG_NON_SM…	NA	NA	NA	NA	NA	NA	NA	NA	NA	NA	NA	NA	NA	NA	combination	0.0300673	0.313116	126	Act	AUTOMATIC_PASS	PASS	combination	2.03957e-05	9.86816e-05	11	Act	AUTOMATIC_PASS	PASS	14	0.0347395	5	0.0124069	9	0.0223325		19	6	13
STAG2	Xq25	DIFFUSE_GLIOMA_ALL_403;DIFFUSE_GLIOMA_PRIMARY_338;DIFFUSE_GLIOMA_RECURRENCE_65;GBM_256;GBM_PRIMARY_232	Established driver in glioma	YES	TSG	LoF	LoF	TSG	YES	YES	OTHER_WXS_AML_PRY_BEAT_2018;ICGC_WXS_BLCA_CN;CBIOP_WXS_BLCA_BGI;TCGA_WXS_BLCA;HARTWIG_URINARY_TRACT;ICGC_WGS_BOCA_FR_AD;ICGC_WGS_BOCA_FR_PED;PEDCBIOP_WGS_ES_IOCURIE_2014;TCGA_WXS_GBM;ICGC_WXS_LUSC_KR_WXS;OTHER_WGS_PBCA_DE_MB;PEDCBIOP_WXS_MBL_BROAD_2012;OTHER_WGS_PBCA_DE_PIA;TCGA_WXS_KIRC;TCGA_WXS_KIRP;HARTWIG_SKIN_BASAL_CELL_CARCINOMA;ICGC_WXS_THCA_SA	dndscv,smregions,cbase,mutpanning	1.5212e-14	2.16397e-15	11	LoF	AUTOMATIC_PASS	PASS	dndscv,smregions,cbase,mutpanning	4.43905e-13	8.76406e-14	5	LoF	AUTOMATIC_PASS	PASS	NA	NA	NA	NA	NA	NA	NA	NA	NA	NA	NA	NA	NA	NA	14	0.0347395	10	0.0248139	4	0.00992556	p.Arg259Ter (3)	15	10	5
TENM2	5q34	ASTROCYTOMA_IDH_MUTANT_89;ASTROCYTOMA_IDH_MUTANT_PRIMARY_67;ASTROCYTOMA_IDH_MUTANT_RECURRENCE_22	Candidate glioma driver	NO	TSG	NA	Act	NA	NO	NO	NONE	NA	NA	NA	NA	NA	NA	NA	NA	NA	NA	NA	NA	NA	NA	cbase,mutpanning	0.000309483		95	LoF	MANUAL_REVIEW	LITERATURE	NA	NA	NA	NA	NA	NA	NA	11	0.0272953	1	0.00248139	10	0.0248139		18	1	17
TERT	NA		Established driver in glioma	NA	Oncogene	NA	NA	Oncogene	NA	NA	NA	NA	NA	NA	NA	NA	NA	NA	NA	NA	NA	NA	NA	NA	NA	NA	NA	NA	NA	NA	NA	NA	NA	NA	NA	NA	NA	NA	NA	293	0.727047	290	0.719603	3	0.00744417	TERTp. (209);TERTp. (81)	301	290	11
TMEM132C	12q24.32	DIFFUSE_GLIOMA_ALL_403;DIFFUSE_GLIOMA_PRIMARY_338;DIFFUSE_GLIOMA_RECURRENCE_65;GBM_256;GBM_PRIMARY_232	Candidate glioma driver	NO	Oncogene	NA	ambiguous	NA	NO	NO	NONE	dndscv,cbase	3.55681e-06		19	Act	MANUAL_REVIEW	LITERATURE	dndscv,cbase	0.00726411		13	Act	MANUAL_REVIEW	LITERATURE	NA	NA	NA	NA	NA	NA	NA	NA	NA	NA	NA	NA	NA	NA	18	0.044665	0	0	18	0.044665		21	0	21
TP53	17p13.1	DIFFUSE_GLIOMA_ALL_403;DIFFUSE_GLIOMA_PRIMARY_338;DIFFUSE_GLIOMA_RECURRENCE_65;GBM_256;GBM_PRIMARY_232;ASTROCYTOMA_IDH_MUTANT_89;ASTROCYTOMA_IDH_MUTANT_PRIMARY_67;ASTROCYTOMA_IDH_MUTANT_RECURRENCE_22	Established driver in glioma	YES	TSG	LoF	LoF	TSG	YES	YES	TCGA_WXS_ACC;PEDCBIOP_WXS_BALL-REL;D_ALL;OTHER_WXS_AML_PRY_BEAT_2018;TCGA_WXS_LAML;HARTWIG_ANUS;CBIOP_WXS_ANGS_PAINTER_2018_TREAT;HARTWIG_SMALL_INTESTINE;ICGC_WXS_BLCA_CN;CBIOP_WXS_BLCA_BGI;CBIOP_WXS_BLCA_DFARBER_MSKCC_2014;PCAWG_WGS_BLADDER_TCC;TCGA_WXS_BLCA;HARTWIG_URINARY_TRACT;PEDCBIOP_WXS_BLY-PRY;CBIOP_WXS_BRCA_MBCPROJECT_2018_PRY_TREAT;CBIOP_WXS_BRCA_MBCPROJECT_2018_MET_TREAT;ICGC_WGS_BRCA_…	oncodrivefml,dndscv,smregions,cbase,mutpanning,hotmaps	4.18075e-50	5.9473e-51	1	LoF	AUTOMATIC_PASS	PASS	oncodrivefml,dndscv,smregions,cbase,mutpanning,hotmaps	5.67201e-40	1.11983e-40	2	LoF	AUTOMATIC_PASS	PASS	oncodrivefml,oncodriveclustl,dndscv,smregions,cbase,mutpanning,hotmaps	6.11231e-48	9.90998e-48	2	LoF	AUTOMATIC_PASS	PASS	NA	NA	NA	NA	NA	NA	NA	152	0.377171	151	0.37469	1	0.00248139	p.Arg273Cys (26);p.Arg213Ter (4);p.Arg282Trp (3);p.Arg175His (12);p.Ser241Phe (4);p.Arg273His (5);p.Tyr163Cys (3);p.Arg248Gln (4)	193	191	2
TRRAP	7q22.1	DIFFUSE_GLIOMA_ALL_403;DIFFUSE_GLIOMA_PRIMARY_338;DIFFUSE_GLIOMA_RECURRENCE_65	Known driver in other tumour types	YES	Oncogene	ambiguous	Act	NA	NO	YES	CBIOP_WXS_ACY_2019;TCGA_WXS_BLCA;PCAWG_WGS_BILIARY_ADENOCA;TCGA_WXS_SKCM;PCAWG_WGS_SKIN_MELANOMA;TCGA_WXS_ESCA;TCGA_WXS_HNSC;PCAWG_WGS_BONE_LEIOMYO;OTHER_WGS_MM_NATLEUK2018	hotmaps	0.0236076	0.0274769	20	Act	AUTOMATIC_PASS	PASS	NA	NA	NA	NA	NA	NA	NA	NA	NA	NA	NA	NA	NA	NA	NA	NA	NA	NA	NA	NA	NA	12	0.0297767	0	0	12	0.0297767		21	0	21
VAV1	19p13.3	OLIGODENDROGLIOMA_58;OLIGODENDROGLIOMA_PRIMARY_39;OLIGODENDROGLIOMA_RECURRENCE_19	Known driver in other tumour types	YES	Oncogene	NA	Act	Oncogene	NO	YES	PCAWG_WGS_PANC_ADENOCA	NA	NA	NA	NA	NA	NA	NA	NA	NA	NA	NA	NA	NA	NA	NA	NA	NA	NA	NA	NA	NA	combination	0.00539771	0.0571287	101	Act	AUTOMATIC_PASS	PASS	13	0.0322581	0	0	13	0.0322581		13	0	13
ZBTB20	3q13.31	OLIGODENDROGLIOMA_58;OLIGODENDROGLIOMA_PRIMARY_39;OLIGODENDROGLIOMA_RECURRENCE_19	Established driver in glioma	NO	ambiguous	NA	Act	Oncogene;TSG	NO	YES	TCGA_WXS_LGG	NA	NA	NA	NA	NA	NA	NA	NA	NA	NA	NA	NA	NA	NA	NA	NA	NA	NA	NA	NA	NA	dndscv,smregions,cbase	3.23789e-14		5	LoF	AUTOMATIC_PASS	PASS	12	0.0297767	4	0.00992556	8	0.0198511		20	4	16
[truncated: 595 more columns]

## Sheet: ST5 - drivers by subtype
Supplementary Table 5: Frequency of driver gene mutations across glioma subtypes.
Carriers are those with one or more oncogenic mutation in the candidate driver gene. Fisher's exact test was used to test for signifiant differences in pairwise carrier frequencies between glioma subtypes.
Enriched subtypes are those in which the fisher's exact test P-value for that subtype compared to all other glioma tumours was < 0.0167 (correcting for testing for 3 subtypes) and odds ratio (OR) > 1
			All glioma (n=403)			Primary glioma (n=338)			Recurrent glioma (n=65)			All GBM (n=256)			Primary GBM (n=232)			Recurrent GBM (n=24)			All astrocytoma (n=89)			Primary astrocytoma (n=67)			Recurrent astrocytoma (n=22)			All oligodendroglioma (n=58)			Primary oligodendroglioma (n=39)			Recurrent oligodendroglioma (n=19)			non GBM			non primary GBM			non recurrent GBM			non astrocytoma
Gene	Cohorts	Enriched subtypes	n carriers	n noncarriers	freq carriers	n carriers	n noncarriers	freq carriers	n carriers	n noncarriers	freq carriers	n carriers	n noncarriers	freq carriers	n carriers	n noncarriers	freq carriers	n carriers	n noncarriers	freq carriers	n carriers	n noncarriers	freq carriers	n carriers	n noncarriers	freq carriers	n carriers	n noncarriers	freq carriers	n carriers	n noncarriers	freq carriers	n carriers	n noncarriers	freq carriers	n carriers	n noncarriers	freq carriers	n carriers	n noncarriers	freq carriers	n carriers	n noncarriers	freq carriers	n carriers	n noncarriers	freq carriers	n carriers	n noncarriers
TERT		GBM_256;GBM_PRIMARY_232;OLIGODENDROGLIOMA_58;OLIGODENDROGLIOMA_PRIMARY_39	290	113	0.719603	249	89	0.736686	41	24	0.630769	234	22	0.914062	211	21	0.909483	23	1	0.958333	1	88	0.011236	1	66	0.0149254	0	22	0	55	3	0.948276	37	2	0.948718	18	1	0.947368	56	91	0.380952	79	92	0.461988	267	112	0.704485	289	25
TP53	DIFFUSE_GLIOMA_ALL_403;DIFFUSE_GLIOMA_PRIMARY_338;DIFFUSE_GLIOMA_RECURRENCE_65;GBM_256;GBM_PRIMARY_232;GBM_RECURRENCE_24;ASTROCYTOMA_IDH_MUTANT_89;ASTROCYTOMA_IDH_MUTANT_PRIMARY_67;ASTROCYTOMA_IDH_MUTANT_RECURRENCE_22	ASTROCYTOMA_IDH_MUTANT_89;ASTROCYTOMA_IDH_MUTANT_PRIMARY_67;ASTROCYTOMA_IDH_MUTANT_RECURRENCE_22	151	252	0.37469	121	217	0.357988	30	35	0.461538	64	192	0.25	56	176	0.241379	8	16	0.333333	86	3	0.966292	64	3	0.955224	22	0	1	1	57	0.0172414	1	38	0.025641	0	19	0	87	60	0.591837	95	76	0.555556	143	236	0.377309	65	249
IDH1	DIFFUSE_GLIOMA_ALL_403;DIFFUSE_GLIOMA_PRIMARY_338;DIFFUSE_GLIOMA_RECURRENCE_65;ASTROCYTOMA_IDH_MUTANT_89;ASTROCYTOMA_IDH_MUTANT_PRIMARY_67;ASTROCYTOMA_IDH_MUTANT_RECURRENCE_22;OLIGODENDROGLIOMA_58;OLIGODENDROGLIOMA_PRIMARY_39;OLIGODENDROGLIOMA_RECURRENCE_19	DIFFUSE_GLIOMA_RECURRENCE_65;ASTROCYTOMA_IDH_MUTANT_89;ASTROCYTOMA_IDH_MUTANT_PRIMARY_67;ASTROCYTOMA_IDH_MUTANT_RECURRENCE_22;OLIGODENDROGLIOMA_58;OLIGODENDROGLIOMA_PRIMARY_39;OLIGODENDROGLIOMA_RECURRENCE_19	141	262	0.349876	102	236	0.301775	39	26	0.6	0	256	0	0	232	0	0	24	0	87	2	0.977528	65	2	0.970149	22	0	1	54	4	0.931034	37	2	0.948718	17	2	0.894737	141	6	0.959184	141	30	0.824561	141	238	0.372032	54	260
PTEN	DIFFUSE_GLIOMA_ALL_403;DIFFUSE_GLIOMA_PRIMARY_338;DIFFUSE_GLIOMA_RECURRENCE_65;GBM_256;GBM_PRIMARY_232;GBM_RECURRENCE_24	GBM_256;GBM_PRIMARY_232	79	324	0.19603	71	267	0.210059	8	57	0.123077	77	179	0.300781	70	162	0.301724	7	17	0.291667	2	87	0.0224719	1	66	0.0149254	1	21	0.0454545	0	58	0	0	39	0	0	19	0	2	145	0.0136054	9	162	0.0526316	72	307	0.189974	77	237
ATRX	DIFFUSE_GLIOMA_ALL_403;DIFFUSE_GLIOMA_PRIMARY_338;DIFFUSE_GLIOMA_RECURRENCE_65;ASTROCYTOMA_IDH_MUTANT_89;ASTROCYTOMA_IDH_MUTANT_PRIMARY_67;ASTROCYTOMA_IDH_MUTANT_RECURRENCE_22	ASTROCYTOMA_IDH_MUTANT_89;ASTROCYTOMA_IDH_MUTANT_PRIMARY_67;ASTROCYTOMA_IDH_MUTANT_RECURRENCE_22	66	337	0.163772	50	288	0.147929	16	49	0.246154	2	254	0.0078125	2	230	0.00862069	0	24	0	64	25	0.719101	48	19	0.716418	16	6	0.727273	0	58	0	0	39	0	0	19	0	64	83	0.435374	64	107	0.374269	66	313	0.174142	2	312
EGFR	DIFFUSE_GLIOMA_ALL_403;DIFFUSE_GLIOMA_PRIMARY_338;DIFFUSE_GLIOMA_RECURRENCE_65;GBM_256;GBM_PRIMARY_232;GBM_RECURRENCE_24	GBM_256;GBM_PRIMARY_232	42	361	0.104218	39	299	0.115385	3	62	0.0461538	42	214	0.164062	39	193	0.168103	3	21	0.125	0	89	0	0	67	0	0	22	0	0	58	0	0	39	0	0	19	0	0	147	0	3	168	0.0175439	39	340	0.102902	42	272
PIK3CA	DIFFUSE_GLIOMA_ALL_403;DIFFUSE_GLIOMA_PRIMARY_338;DIFFUSE_GLIOMA_RECURRENCE_65;GBM_256;GBM_PRIMARY_232;GBM_RECURRENCE_24;ASTROCYTOMA_IDH_MUTANT_89;ASTROCYTOMA_IDH_MUTANT_PRIMARY_67;ASTROCYTOMA_IDH_MUTANT_RECURRENCE_22	NONE	41	362	0.101737	34	304	0.100592	7	58	0.107692	32	224	0.125	27	205	0.116379	5	19	0.208333	6	83	0.0674157	5	62	0.0746269	1	21	0.0454545	3	55	0.0517241	2	37	0.0512821	1	18	0.0526316	9	138	0.0612245	14	157	0.0818713	36	343	0.0949868	35	279
NF1	DIFFUSE_GLIOMA_ALL_403;DIFFUSE_GLIOMA_PRIMARY_338;DIFFUSE_GLIOMA_RECURRENCE_65;GBM_256;GBM_PRIMARY_232;GBM_RECURRENCE_24;ASTROCYTOMA_IDH_MUTANT_89;ASTROCYTOMA_IDH_MUTANT_PRIMARY_67;ASTROCYTOMA_IDH_MUTANT_RECURRENCE_22	GBM_256	39	364	0.0967742	35	303	0.10355	4	61	0.0615385	34	222	0.132812	30	202	0.12931	4	20	0.166667	3	86	0.0337079	3	64	0.0447761	0	22	0	2	56	0.0344828	2	37	0.0512821	0	19	0	5	142	0.0340136	9	162	0.0526316	35	344	0.0923483	36	278
CIC	DIFFUSE_GLIOMA_ALL_403;DIFFUSE_GLIOMA_PRIMARY_338;DIFFUSE_GLIOMA_RECURRENCE_65;OLIGODENDROGLIOMA_58;OLIGODENDROGLIOMA_PRIMARY_39;OLIGODENDROGLIOMA_RECURRENCE_19	OLIGODENDROGLIOMA_58;OLIGODENDROGLIOMA_PRIMARY_39;OLIGODENDROGLIOMA_RECURRENCE_19	35	368	0.0868486	26	312	0.0769231	9	56	0.138462	1	255	0.00390625	1	231	0.00431034	0	24	0	1	88	0.011236	0	67	0	1	21	0.0454545	33	25	0.568966	25	14	0.641026	8	11	0.421053	34	113	0.231293	34	137	0.19883	35	344	0.0923483	34	280
RB1	DIFFUSE_GLIOMA_ALL_403;DIFFUSE_GLIOMA_PRIMARY_338;DIFFUSE_GLIOMA_RECURRENCE_65;GBM_256;GBM_PRIMARY_232;GBM_RECURRENCE_24	GBM_256	31	372	0.0769231	25	313	0.0739645	6	59	0.0923077	29	227	0.113281	25	207	0.107759	4	20	0.166667	1	88	0.011236	0	67	0	1	21	0.0454545	1	57	0.0172414	0	39	0	1	18	0.0526316	2	145	0.0136054	6	165	0.0350877	27	352	0.0712401	30	284
PIK3R1	DIFFUSE_GLIOMA_ALL_403;DIFFUSE_GLIOMA_PRIMARY_338;DIFFUSE_GLIOMA_RECURRENCE_65;GBM_256;GBM_PRIMARY_232;GBM_RECURRENCE_24;OLIGODENDROGLIOMA_58;OLIGODENDROGLIOMA_PRIMARY_39;OLIGODENDROGLIOMA_RECURRENCE_19	NONE	24	379	0.0595533	21	317	0.0621302	3	62	0.0461538	16	240	0.0625	15	217	0.0646552	1	23	0.0416667	3	86	0.0337079	3	64	0.0447761	0	22	0	5	53	0.0862069	3	36	0.0769231	2	17	0.105263	8	139	0.0544218	9	162	0.0526316	23	356	0.060686	21	293
PTPN11	DIFFUSE_GLIOMA_ALL_403;DIFFUSE_GLIOMA_PRIMARY_338;DIFFUSE_GLIOMA_RECURRENCE_65;GBM_256;GBM_PRIMARY_232;GBM_RECURRENCE_24	GBM_256;GBM_PRIMARY_232	14	389	0.0347395	14	324	0.0414201	0	65	0	14	242	0.0546875	14	218	0.0603448	0	24	0	0	89	0	0	67	0	0	22	0	0	58	0	0	39	0	0	19	0	0	147	0	0	171	0	14	365	0.0369393	14	300
FUBP1	DIFFUSE_GLIOMA_ALL_403;DIFFUSE_GLIOMA_PRIMARY_338;DIFFUSE_GLIOMA_RECURRENCE_65;OLIGODENDROGLIOMA_58;OLIGODENDROGLIOMA_PRIMARY_39;OLIGODENDROGLIOMA_RECURRENCE_19	OLIGODENDROGLIOMA_58;OLIGODENDROGLIOMA_PRIMARY_39	12	391	0.0297767	9	329	0.0266272	3	62	0.0461538	0	256	0	0	232	0	0	24	0	0	89	0	0	67	0	0	22	0	12	46	0.206897	9	30	0.230769	3	16	0.157895	12	135	0.0816327	12	159	0.0701754	12	367	0.0316623	12	302
SETD2	GBM_256;GBM_PRIMARY_232;GBM_RECURRENCE_24	NONE	11	392	0.0272953	7	331	0.0207101	4	61	0.0615385	8	248		7	225	0.0301724	1	23	0.0416667	0	89	0	0	67	0	0	22	0	3	55	0.0517241	0	39	0	3	16	0.157895	3	144	0.0204082	4	167	0.0233918	10	369	0.0263852	11	303
STAG2	DIFFUSE_GLIOMA_ALL_403;DIFFUSE_GLIOMA_PRIMARY_338;DIFFUSE_GLIOMA_RECURRENCE_65;GBM_256;GBM_PRIMARY_232;GBM_RECURRENCE_24	NONE	10	393	0.0248139	9	329	0.0266272	1	64	0.0153846	10	246	0.0390625	9	223	0.0387931	1	23	0.0416667	0	89	0	0	67	0	0	22	0	0	58	0	0	39	0	0	19	0	0	147	0	1	170	0.00584795	9	370	0.0237467	10	304
CDKN2A	DIFFUSE_GLIOMA_ALL_403;DIFFUSE_GLIOMA_PRIMARY_338;DIFFUSE_GLIOMA_RECURRENCE_65;GBM_256;GBM_PRIMARY_232;GBM_RECURRENCE_24	NONE	9	394	0.0223325	9	329	0.0266272	0	65	0	7	249	0.0273438	7	225	0.0301724	0	24	0	1	88	0.011236	1	66	0.0149254	0	22	0	1	57	0.0172414	1	38	0.025641	0	19	0	2	145	0.0136054	2	169	0.0116959	9	370	0.0237467	8	306
ARID1A	DIFFUSE_GLIOMA_ALL_403;DIFFUSE_GLIOMA_PRIMARY_338;DIFFUSE_GLIOMA_RECURRENCE_65;OLIGODENDROGLIOMA_58;OLIGODENDROGLIOMA_PRIMARY_39;OLIGODENDROGLIOMA_RECURRENCE_19	NONE	8	395	0.0198511	6	332	0.0177515	2	63	0.0307692	1	255	0.00390625	1	231	0.00431034	0	24	0	4	85	0.0449438	4	63	0.0597015	0	22	0	3	55	0.0517241	1	38	0.025641	2	17	0.105263	7	140	0.047619	7	164	0.0409357	8	371	0.0211082	4	310
BCOR	DIFFUSE_GLIOMA_ALL_403;DIFFUSE_GLIOMA_PRIMARY_338;DIFFUSE_GLIOMA_RECURRENCE_65;OLIGODENDROGLIOMA_58;OLIGODENDROGLIOMA_PRIMARY_39;OLIGODENDROGLIOMA_RECURRENCE_19	NONE	8	395	0.0198511	4	334	0.0118343	4	61	0.0615385	2	254	0.0078125	1	231	0.00431034	1	23	0.0416667	3	86	0.0337079	3	64	0.0447761	0	22	0	3	55	0.0517241	0	39	0	3	16	0.157895	6	141	0.0408163	7	164	0.0409357	7	372	0.0184697	5	309
PDGFRA	DIFFUSE_GLIOMA_ALL_403;DIFFUSE_GLIOMA_PRIMARY_338;DIFFUSE_GLIOMA_RECURRENCE_65;GBM_256;GBM_PRIMARY_232;GBM_RECURRENCE_24	NONE	8	395	0.0198511	8	330	0.0236686	0	65	0	8	248	0.03125	8	224	0.0344828	0	24	0	0	89	0	0	67	0	0	22	0	0	58	0	0	39	0	0	19	0	0	147	0	0	171	0	8	371	0.0211082	8	306
NOTCH1	DIFFUSE_GLIOMA_ALL_403;DIFFUSE_GLIOMA_PRIMARY_338;DIFFUSE_GLIOMA_RECURRENCE_65;OLIGODENDROGLIOMA_58;OLIGODENDROGLIOMA_PRIMARY_39;OLIGODENDROGLIOMA_RECURRENCE_19	OLIGODENDROGLIOMA_58;OLIGODENDROGLIOMA_RECURRENCE_19	7	396	0.0173697	4	334	0.0118343	3	62	0.0461538	1	255	0.00390625	1	231	0.00431034	0	24	0	0	89	0	0	67	0	0	22	0	6	52	0.103448	3	36	0.0769231	3	16	0.157895	6	141	0.0408163	6	165	0.0350877	7	372	0.0184697	7	307
ARID2	ASTROCYTOMA_IDH_MUTANT_89;ASTROCYTOMA_IDH_MUTANT_PRIMARY_67;ASTROCYTOMA_IDH_MUTANT_RECURRENCE_22	NONE	7	396	0.0173697	5	333	0.0147929	2	63	0.0307692	2	254	0.0078125	2	230	0.00862069	0	24	0	4	85	0.0449438	3	64	0.0447761	1	21	0.0454545	1	57	0.0172414	0	39	0	1	18	0.0526316	5	142	0.0340136	5	166	0.0292398	7	372	0.0184697	3	311
IDH2	DIFFUSE_GLIOMA_ALL_403;DIFFUSE_GLIOMA_PRIMARY_338;DIFFUSE_GLIOMA_RECURRENCE_65;ASTROCYTOMA_IDH_MUTANT_89;ASTROCYTOMA_IDH_MUTANT_PRIMARY_67;ASTROCYTOMA_IDH_MUTANT_RECURRENCE_22;OLIGODENDROGLIOMA_58;OLIGODENDROGLIOMA_PRIMARY_39;OLIGODENDROGLIOMA_RECURRENCE_19	NONE	6	397	0.0148883	4	334	0.0118343	2	63	0.0307692	0	256	0	0	232	0	0	24	0	2	87	0.0224719	2	65	0.0298507	0	22	0	4	54	0.0689655	2	37	0.0512821	2	17	0.105263	6	141	0.0408163	6	165	0.0350877	6	373	0.0158311	4	310
CREBBP	GBM_256;GBM_PRIMARY_232;GBM_RECURRENCE_24	NONE	6	397	0.0148883	4	334	0.0118343	2	63	0.0307692	5	251	0.0195312	4	228	0.0172414	1	23	0.0416667	0	89	0	0	67	0	0	22	0	1	57	0.0172414	0	39	0	1	18	0.0526316	1	146	0.00680272	2	169	0.0116959	5	374	0.0131926	6	308
SMARCA4	ASTROCYTOMA_IDH_MUTANT_89;ASTROCYTOMA_IDH_MUTANT_PRIMARY_67;ASTROCYTOMA_IDH_MUTANT_RECURRENCE_22;OLIGODENDROGLIOMA_58;OLIGODENDROGLIOMA_PRIMARY_39;OLIGODENDROGLIOMA_RECURRENCE_19	NONE	5	398	0.0124069	4	334	0.0118343	1	64	0.0153846	1	255	0.00390625	0	232	0	1	23	0.0416667	2	87	0.0224719	2	65	0.0298507	0	22	0	2	56	0.0344828	2	37	0.0512821	0	19	0	4	143	0.0272109	5	166	0.0292398	4	375	0.0105541	3	311
BRAF	DIFFUSE_GLIOMA_ALL_403;DIFFUSE_GLIOMA_PRIMARY_338;DIFFUSE_GLIOMA_RECURRENCE_65;GBM_256;GBM_PRIMARY_232;GBM_RECURRENCE_24	NONE	5	398	0.0124069	3	335	0.00887574	2	63	0.0307692	5	251	0.0195312	3	229	0.012931	2	22	0.0833333	0	89	0	0	67	0	0	22	0	0	58	0	0	39	0	0	19	0	0	147	0	2	169	0.0116959	3	376	0.00791557	5	309
ZBTB20	OLIGODENDROGLIOMA_58;OLIGODENDROGLIOMA_PRIMARY_39;OLIGODENDROGLIOMA_RECURRENCE_19	OLIGODENDROGLIOMA_58;OLIGODENDROGLIOMA_PRIMARY_39	4	399	0.00992556	4	334	0.0118343	0	65	0	0	256	0	0	232	0	0	24	0	0	89	0	0	67	0	0	22	0	4	54	0.0689655	4	35	0.102564	0	19	0	4	143	0.0272109	4	167	0.0233918	4	375	0.0105541	4	310
SETD1B	GBM_256;GBM_PRIMARY_232;GBM_RECURRENCE_24	NONE	4	399	0.00992556	3	335	0.00887574	1	64	0.0153846	2	254	0.0078125	2	230	0.00862069	0	24	0	1	88	0.011236	1	66	0.0149254	0	22	0	1	57	0.0172414	0	39	0	1	18	0.0526316	2	145	0.0136054	2	169	0.0116959	4	375	0.0105541	3	311
COL3A1	DIFFUSE_GLIOMA_ALL_403;DIFFUSE_GLIOMA_PRIMARY_338;DIFFUSE_GLIOMA_RECURRENCE_65;GBM_256;GBM_PRIMARY_232;GBM_RECURRENCE_24	NONE	4	399	0.00992556	4	334	0.0118343	0	65	0	4	252	0.015625	4	228	0.0172414	0	24	0	0	89	0	0	67	0	0	22	0	0	58	0	0	39	0	0	19	0	0	147	0	0	171	0	4	375	0.0105541	4	310
KRAS	DIFFUSE_GLIOMA_ALL_403;DIFFUSE_GLIOMA_PRIMARY_338;DIFFUSE_GLIOMA_RECURRENCE_65	NONE	3	400	0.00744417	3	335	0.00887574	0	65	0	2	254	0.0078125	2	230	0.00862069	0	24	0	0	89	0	0	67	0	0	22	0	1	57	0.0172414	1	38	0.025641	0	19	0	1	146	0.00680272	1	170	0.00584795	3	376	0.00791557	3	311
PIK3CB	DIFFUSE_GLIOMA_ALL_403;DIFFUSE_GLIOMA_PRIMARY_338;DIFFUSE_GLIOMA_RECURRENCE_65;GBM_256;GBM_PRIMARY_232;GBM_RECURRENCE_24	NONE	3	400	0.00744417	3	335	0.00887574	0	65	0	3	253	0.0117188	3	229	0.012931	0	24	0	0	89	0	0	67	0	0	22	0	0	58	0	0	39	0	0	19	0	0	147	0	0	171	0	3	376	0.00791557	3	311
PPM1D	GBM_256;GBM_PRIMARY_232;GBM_RECURRENCE_24	NONE	3	400	0.00744417	2	336	0.00591716	1	64	0.0153846	3	253	0.0117188	2	230	0.00862069	1	23	0.0416667	0	89	0	0	67	0	0	22	0	0	58	0	0	39	0	0	19	0	0	147	0	1	170	0.00584795	2	377	0.00527704	3	311
SALL3	ASTROCYTOMA_IDH_MUTANT_89;ASTROCYTOMA_IDH_MUTANT_PRIMARY_67;ASTROCYTOMA_IDH_MUTANT_RECURRENCE_22	NONE	2	401	0.00496278	2	336	0.00591716	0	65	0	0	256	0	0	232	0	0	24	0	2	87	0.0224719	2	65	0.0298507	0	22	0	0	58	0	0	39	0	0	19	0	2	145	0.0136054	2	169	0.0116959	2	377	0.00527704	0	314
ARID1B	ASTROCYTOMA_IDH_MUTANT_89;ASTROCYTOMA_IDH_MUTANT_PRIMARY_67;ASTROCYTOMA_IDH_MUTANT_RECURRENCE_22	NONE	2	401	0.00496278	2	336	0.00591716	0	65	0	1	255	0.00390625	1	231	0.00431034	0	24	0	1	88	0.011236	1	66	0.0149254	0	22	0	0	58	0	0	39	0	0	19	0	1	146	0.00680272	1	170	0.00584795	2	377	0.00527704	1	313
BCORL1	ASTROCYTOMA_IDH_MUTANT_89;ASTROCYTOMA_IDH_MUTANT_PRIMARY_67;ASTROCYTOMA_IDH_MUTANT_RECURRENCE_22	NONE	2	401	0.00496278	2	336	0.00591716	0	65	0	1	255	0.00390625	1	231	0.00431034	0	24	0	1	88	0.011236	1	66	0.0149254	0	22	0	0	58	0	0	39	0	0	19	0	1	146	0.00680272	1	170	0.00584795	2	377	0.00527704	1	313
PBRM1	OLIGODENDROGLIOMA_58;OLIGODENDROGLIOMA_PRIMARY_39;OLIGODENDROGLIOMA_RECURRENCE_19	NONE	2	401	0.00496278	2	336	0.00591716	0	65	0	1	255	0.00390625	1	231	0.00431034	0	24	0	1	88	0.011236	1	66	0.0149254	0	22	0	0	58	0	0	39	0	0	19	0	1	146	0.00680272	1	170	0.00584795	2	377	0.00527704	1	313
LZTR1	GBM_256;GBM_PRIMARY_232;GBM_RECURRENCE_24	NONE	2	401	0.00496278	2	336	0.00591716	0	65	0	2	254	0.0078125	2	230	0.00862069	0	24	0	0	89	0	0	67	0	0	22	0	0	58	0	0	39	0	0	19	0	0	147	0	0	171	0	2	377	0.00527704	2	312
CDKN2C	DIFFUSE_GLIOMA_ALL_403;DIFFUSE_GLIOMA_PRIMARY_338;DIFFUSE_GLIOMA_RECURRENCE_65	NONE	1	402	0.00248139	1	337	0.00295858	0	65	0	0	256	0	0	232	0	0	24	0	0	89	0	0	67	0	0	22	0	1	57	0.0172414	1	38	0.025641	0	19	0	1	146	0.00680272	1	170	0.00584795	1	378	0.00263852	1	313
CDC73	OLIGODENDROGLIOMA_58;OLIGODENDROGLIOMA_PRIMARY_39;OLIGODENDROGLIOMA_RECURRENCE_19	NONE	1	402	0.00248139	1	337	0.00295858	0	65	0	0	256	0	0	232	0	0	24	0	1	88	0.011236	1	66	0.0149254	0	22	0	0	58	0	0	39	0	0	19	0	1	146	0.00680272	1	170	0.00584795	1	378	0.00263852	0	314
TENM2	ASTROCYTOMA_IDH_MUTANT_89;ASTROCYTOMA_IDH_MUTANT_PRIMARY_67;ASTROCYTOMA_IDH_MUTANT_RECURRENCE_22	NONE	1	402	0.00248139	0	338	0	1	64	0.0153846	0	256	0	0	232	0	0	24	0	1	88	0.011236	0	67	0	1	21	0.0454545	0	58	0	0	39	0	0	19	0	1	146	0.00680272	1	170	0.00584795	1	378	0.00263852	0	314
SFPQ	DIFFUSE_GLIOMA_ALL_403;DIFFUSE_GLIOMA_PRIMARY_338;DIFFUSE_GLIOMA_RECURRENCE_65	NONE	0	403	0	0	338	0	0	65	0	0	256	0	0	232	0	0	24	0	0	89	0	0	67	0	0	22	0	0	58	0	0	39	0	0	19	0	0	147	0	0	171	0	0	379	0	0	314
TMEM132C	DIFFUSE_GLIOMA_ALL_403;DIFFUSE_GLIOMA_PRIMARY_338;DIFFUSE_GLIOMA_RECURRENCE_65;GBM_256;GBM_PRIMARY_232;GBM_RECURRENCE_24	NONE	0	403	0	0	338	0	0	65	0	0	256	0	0	232	0	0	24	0	0	89	0	0	67	0	0	22	0	0	58	0	0	39	0	0	19	0	0	147	0	0	171	0	0	379	0	0	314
TRRAP	DIFFUSE_GLIOMA_ALL_403;DIFFUSE_GLIOMA_PRIMARY_338;DIFFUSE_GLIOMA_RECURRENCE_65	NONE	0	403	0	0	338	0	0	65	0	0	256	0	0	232	0	0	24	0	0	89	0	0	67	0	0	22	0	0	58	0	0	39	0	0	19	0	0	147	0	0	171	0	0	379	0	0	314
VAV1	OLIGODENDROGLIOMA_58;OLIGODENDROGLIOMA_PRIMARY_39;OLIGODENDROGLIOMA_RECURRENCE_19	NONE	0	403	0	0	338	0	0	65	0	0	256	0	0	232	0	0	24	0	0	89	0	0	67	0	0	22	0	0	58	0	0	39	0	0	19	0	0	147	0	0	171	0	0	379	0	0	314
[truncated: 172 more columns]

## Sheet: ST6 - recurrent muts by subtype
Supplementary Table 6: Frequency of recurrent driver mutations across glioma subtypes.
All mutations in candidate driver genes with carrier count > 4 are listed. Fisher's exact test was used to test for signifiant differences in pairwise carrier frequencies between glioma subtypes.
Enriched subtypes are those in which the fisher's exact test P-value for that subtype compared to all other glioma tumours was < 0.00556 (correcting for testing for 9 subtypes) and odds ratio (OR) > 1
		All glioma (n=403)			Primary glioma (n=338)			Recurrent glioma (n=65)			All GBM (n=256)			Primary GBM (n=232)			Recurrent GBM (n=24)			All astrocytoma (n=89)			Primary astrocytoma (n=67)			Recurrent astrocytoma (n=22)			All oligodendroglioma (n=58)			Primary oligodendroglioma (n=39)			Recurrent oligodendroglioma (n=19)			non GBM			non primary GBM			non recurrent GBM			non astrocytoma
Gene	Enriched subtypes	n carriers	n noncarriers	freq carriers	n carriers	n noncarriers	freq carriers	n carriers	n noncarriers	freq carriers	n carriers	n noncarriers	freq carriers	n carriers	n noncarriers	freq carriers	n carriers	n noncarriers	freq carriers	n carriers	n noncarriers	freq carriers	n carriers	n noncarriers	freq carriers	n carriers	n noncarriers	freq carriers	n carriers	n noncarriers	freq carriers	n carriers	n noncarriers	freq carriers	n carriers	n noncarriers	freq carriers	n carriers	n noncarriers	freq carriers	n carriers	n noncarriers	freq carriers	n carriers	n noncarriers	freq carriers	n carriers	n noncarriers	freq carriers
TERT_chr5_1295113_G_A_TERTp.	GBM_256;GBM_PRIMARY_232	209	194	0.51861	180	158	0.532544	29	36	0.446154	170	86	0.664062	153	79	0.659483	17	7	0.708333	1	88	0.011236	1	66	0.0149254	0	22	0	38	20	0.655172	26	13	0.666667	12	7	0.631579	39	108	0.265306	56	115	0.327485	192	187	0.506596	208	106	0.66242
IDH1_chr2_208248388_C_T_p.Arg132His	DIFFUSE_GLIOMA_RECURRENCE_65;ASTROCYTOMA_IDH_MUTANT_89;ASTROCYTOMA_IDH_MUTANT_PRIMARY_67;ASTROCYTOMA_IDH_MUTANT_RECURRENCE_22;OLIGODENDROGLIOMA_58;OLIGODENDROGLIOMA_PRIMARY_39;OLIGODENDROGLIOMA_RECURRENCE_19	122	281	0.30273	91	247	0.269231	31	34	0.476923	0	256	0	0	232	0	0	24	0	69	20	0.775281	54	13	0.80597	15	7	0.681818	53	5	0.913793	37	2	0.948718	16	3	0.842105	122	25	0.829932	122	49	0.71345	122	257	0.3219	53	261	0.16879
TERT_chr5_1295135_G_A_TERTp.	GBM_256	81	322	0.200993	69	269	0.204142	12	53	0.184615	64	192	0.25	58	174	0.25	6	18	0.25	0	89	0	0	67	0	0	22	0	17	41	0.293103	11	28	0.282051	6	13	0.315789	17	130	0.115646	23	148	0.134503	75	304	0.197889	81	233	0.257962
TP53_chr17_7673803_G_A_p.Arg273Cys	ASTROCYTOMA_IDH_MUTANT_89;ASTROCYTOMA_IDH_MUTANT_PRIMARY_67;ASTROCYTOMA_IDH_MUTANT_RECURRENCE_22	26	377	0.0645161	19	319	0.056213	7	58	0.107692	3	253	0.0117188	3	229	0.012931	0	24	0	23	66	0.258427	16	51	0.238806	7	15	0.318182	0	58	0	0	39	0	0	19	0	23	124	0.156463	23	148	0.134503	26	353	0.0686016	3	311	0.00955414
EGFR_chr7_55154129_C_T_p.Ala289Val	GBM_256;GBM_PRIMARY_232	13	390	0.0322581	13	325	0.0384615	0	65	0	13	243	0.0507812	13	219	0.0560345	0	24	0	0	89	0	0	67	0	0	22	0	0	58	0	0	39	0	0	19	0	0	147	0	0	171	0	13	366	0.0343008	13	301	0.0414013
TP53_chr17_7675088_C_T_p.Arg175His	NONE	12	391	0.0297767	11	327	0.0325444	1	64	0.0153846	7	249	0.0273438	7	225	0.0301724	0	24	0	5	84	0.0561798	4	63	0.0597015	1	21	0.0454545	0	58	0	0	39	0	0	19	0	5	142	0.0340136	5	166	0.0292398	12	367	0.0316623	7	307	0.022293
EGFR_chr7_55165350_G_T_p.Gly598Val	NONE	11	392	0.0272953	10	328	0.0295858	1	64	0.0153846	11	245	0.0429688	10	222	0.0431034	1	23	0.0416667	0	89	0	0	67	0	0	22	0	0	58	0	0	39	0	0	19	0	0	147	0	1	170	0.00584795	10	369	0.0263852	11	303	0.0350318
IDH1_chr2_208248389_G_A_p.Arg132Cys	ASTROCYTOMA_IDH_MUTANT_89;ASTROCYTOMA_IDH_MUTANT_PRIMARY_67	8	395	0.0198511	6	332	0.0177515	2	63	0.0307692	0	256	0	0	232	0	0	24	0	8	81	0.0898876	6	61	0.0895522	2	20	0.0909091	0	58	0	0	39	0	0	19	0	8	139	0.0544218	8	163	0.0467836	8	371	0.0211082	0	314	0
PTEN_chr10_87957915_C_T_p.Arg233Ter	NONE	6	397	0.0148883	5	333	0.0147929	1	64	0.0153846	6	250	0.0234375	5	227	0.0215517	1	23	0.0416667	0	89	0	0	67	0	0	22	0	0	58	0	0	39	0	0	19	0	0	147	0	1	170	0.00584795	5	374	0.0131926	6	308	0.0191083
IDH1_chr2_208248389_G_T_p.Arg132Ser	ASTROCYTOMA_IDH_MUTANT_89;ASTROCYTOMA_IDH_MUTANT_RECURRENCE_22	6	397	0.0148883	3	335	0.00887574	3	62	0.0461538	0	256	0	0	232	0	0	24	0	6	83	0.0674157	3	64	0.0447761	3	19	0.136364	0	58	0	0	39	0	0	19	0	6	141	0.0408163	6	165	0.0350877	6	373	0.0158311	0	314	0
TP53_chr17_7673802_C_T_p.Arg273His	NONE	5	398	0.0124069	4	334	0.0118343	1	64	0.0153846	1	255	0.00390625	1	231	0.00431034	0	24	0	4	85	0.0449438	3	64	0.0447761	1	21	0.0454545	0	58	0	0	39	0	0	19	0	4	143	0.0272109	4	167	0.0233918	5	374	0.0131926	1	313	0.00318471
PTEN_chr10_87961095_C_T_p.Arg335Ter	NONE	5	398	0.0124069	5	333	0.0147929	0	65	0	4	252	0.015625	4	228	0.0172414	0	24	0	1	88	0.011236	1	66	0.0149254	0	22	0.0454545	0	58	0	0	39	0	0	19	0	1	146	0.00680272	1	170	0.00584795	5	374	0.0131926	4	310	0.0127389
PIK3CA_chr3_179199690_G_A_p.Gly118Asp	NONE	5	398	0.0124069	5	333	0.0147929	0	65	0	5	251	0.0195312	5	227	0.0215517	0	24	0	0	89	0	0	67	0	0	22	0	0	58	0	0	39	0	0	19	0	0	147	0	0	171	0	5	374	0.0131926	5	309	0.0159236
PIK3CA_chr3_179199088_G_A_p.Arg88Gln	NONE	5	398	0.0124069	4	334	0.0118343	1	64	0.0153846	5	251	0.0195312	4	228	0.0172414	1	23	0.0416667	0	89	0	0	67	0	0	22	0	0	58	0	0	39	0	0	19	0	0	147	0	1	170	0.00584795	4	375	0.0105541	5	309	0.0159236
ARID1A_chr1_26773690_CGCA_C_p.Gln1334del	NONE	5	398	0.0124069	3	335	0.00887574	2	63	0.0307692	3	253	0.0117188	3	229	0.012931	0	24	0	2	87	0.0224719	0	67	0	2	20	0.0909091	0	58	0	0	39	0	0	19	0	2	145	0.0136054	2	169	0.0116959	5	374	0.0131926	3	311	0.00955414
[truncated: 171 more columns]

## Sheet: ST7 - noncoding drivers
Supplementary Table 7: Non-coding elements identified by OncodriveFML as significantly enriched for mutations of high functional impact.
Recurrently mutated non-coding elememts identified in all diffuse glioma tumours.
	OncodriveFML result		All glioma (n=403)									Primary glioma (n=338)									Recurrent glioma (n=65)									All GBM (n=256)									Primary GBM (n=232)									Recurrent GBM (n=24)
REGION	P-value	Q-value	n carriers	freq carriers	n mutations	freq mutations	n SNVs	freq SNVs	n indels	freq indels	Recurrent mutations	n carriers	freq carriers	n mutations	freq mutations	n SNVs	freq SNVs	n indels	freq indels	Recurrent mutations	n carriers	freq carriers	n mutations	freq mutations	n SNVs	freq SNVs	n indels	freq indels	Recurrent mutations	n carriers	freq carriers	n mutations	freq mutations	n SNVs	freq SNVs	n indels	freq indels	Recurrent mutations	n carriers	freq carriers	n mutations	freq mutations	n SNVs	freq SNVs	n indels	freq indels	Recurrent mutations	n carriers	freq carriers
CORE_PROMOTERS|TERT_ENSG00000164362	1e-08	3.54e-06	293	0.727047	295	0.73201	294	0.729529	1	0.00248139	chr5_1295113_G_A (209);chr5_1295135_G_A (81)	251	0.742604	252	0.745562	251	0.742604	1	0.00295858	chr5_1295113_G_A (180);chr5_1295135_G_A (69)	42	0.646154	43	0.661538	43	0.661538	0	0	chr5_1295113_G_A (29);chr5_1295135_G_A (12)	234	0.914062	234	0.914062	234	0.914062	0	0	chr5_1295113_G_A (170);chr5_1295135_G_A (64)	211	0.909483	211	0.909483	211	0.909483	0	0	chr5_1295113_G_A (153);chr5_1295135_G_A (58)	23	0.958333
DISTAL_PROMOTERS|TERT_ENSG00000164362	1e-08	4.763e-05	293	0.727047	295	0.73201	293	0.727047	2	0.00496278	chr5_1295113_G_A (209);chr5_1295135_G_A (81)	252	0.745562	253	0.748521	251	0.742604	2	0.00591716	chr5_1295113_G_A (180);chr5_1295135_G_A (69)	41	0.630769	42	0.646154	42	0.646154	0	0	chr5_1295113_G_A (29);chr5_1295135_G_A (12)	235	0.917969	236	0.921875	235	0.917969	1	0.00390625	chr5_1295113_G_A (170);chr5_1295135_G_A (64)	212	0.913793	213	0.918103	212	0.913793	1	0.00431034	chr5_1295113_G_A (153);chr5_1295135_G_A (58)	23	0.958333
3_PRIME_UTRS|CCDC85C_ENSG00000205476	1.3e-06	0.0044785	12	0.0297767	23	0.057072	18	0.044665	5	0.0124069	chr14_99512475_G_GA (4)	10	0.0295858	20	0.0591716	15	0.0443787	5	0.0147929	chr14_99512475_G_GA (4)	2	0.0307692	3	0.0461538	3	0.0461538	0	0		8	0.03125	13	0.0507812	10	0.0390625	3	0.0117188	chr14_99512475_G_GA (2)	7	0.0301724	11	0.0474138	8	0.0344828	3	0.012931	chr14_99512475_G_GA (2)	1	0.0416667
ENHANCERS|enhancer|chr7:49669400-49670000	1e-08	0.00010511	7	0.0173697	7	0.0173697	0	0	7	0.0173697	chr7_49669618_G_GT (5)	7	0.0207101	7	0.0207101	0	0	7	0.0207101	chr7_49669618_G_GT (5)	0	0	0	0	0	0	0	0		6	0.0234375	6	0.0234375	0	0	6	0.0234375	chr7_49669618_G_GT (4)	6	0.0258621	6	0.0258621	0	0	6	0.0258621	chr7_49669618_G_GT (4)	0	0
CTCF_SITES|CTCF|chr1:16951200-16952600	1e-08	8.58e-05	8	0.0198511	8	0.0198511	0	0	8	0.0198511	chr1_16951413_AGTACT_A (7)	7	0.0207101	7	0.0207101	0	0	7	0.0207101	chr1_16951413_AGTACT_A (6)	1	0.0153846	1	0.0153846	0	0	1	0.0153846	chr1_16951413_AGTACT_A (1)	6	0.0234375	6	0.0234375	0	0	6	0.0234375	chr1_16951413_AGTACT_A (5)	6	0.0258621	6	0.0258621	0	0	6	0.0258621	chr1_16951413_AGTACT_A (5)	0	0
OPEN_CHROMATIN|openChromatin|chr15:21014137-21014308	9.6e-07	0.00408864	6	0.0148883	6	0.0148883	0	0	6	0.0148883	chr15_21014198_C_CATAACCCTG (6)	6	0.0177515	6	0.0177515	0	0	6	0.0177515	chr15_21014198_C_CATAACCCTG (6)	0	0	0	0	0	0	0	0		5	0.0195312	5	0.0195312	0	0	5	0.0195312	chr15_21014198_C_CATAACCCTG (5)	5	0.0215517	5	0.0215517	0	0	5	0.0215517	chr15_21014198_C_CATAACCCTG (5)	0	0
GENEHANCER_BRAIN|GH05J001293|chr5:1294199-1295601	1e-08	0.000120797	292	0.724566	294	0.729529	293	0.727047	1	0.00248139	chr5_1295113_G_A (209);chr5_1295135_G_A (81)	251	0.742604	252	0.745562	251	0.742604	1	0.00295858	chr5_1295113_G_A (180);chr5_1295135_G_A (69)	41	0.630769	42	0.646154	42	0.646154	0	0	chr5_1295113_G_A (29);chr5_1295135_G_A (12)	234	0.914062	235	0.917969	235	0.917969	0	0	chr5_1295113_G_A (170);chr5_1295135_G_A (64)	211	0.909483	212	0.913793	212	0.913793	0	0	chr5_1295113_G_A (153);chr5_1295135_G_A (58)	23	0.958333
GENEHANCER_BRAIN|GH07J055107|chr7:55107542-55114199	1e-08	0.000120797	17	0.0421836	40	0.0992556	39	0.0967742	1	0.00248139		11	0.0325444	33	0.0976331	32	0.0946746	1	0.00295858		6	0.0923077	7	0.107692	7	0.107692	0	0		12	0.046875	34	0.132812	33	0.128906	1	0.00390625		8	0.0344828	29	0.125	28	0.12069	1	0.00431034		4	0.166667
GENEHANCER_BRAIN|GH07J049669|chr7:49669400-49670000	1e-08	0.000120797	7	0.0173697	7	0.0173697	0	0	7	0.0173697	chr7_49669618_G_GT (5)	7	0.0207101	7	0.0207101	0	0	7	0.0207101	chr7_49669618_G_GT (5)	0	0	0	0	0	0	0	0		6	0.0234375	6	0.0234375	0	0	6	0.0234375	chr7_49669618_G_GT (4)	6	0.0258621	6	0.0258621	0	0	6	0.0258621	chr7_49669618_G_GT (4)	0	0
GENEHANCER_BRAIN|GH05J052809|chr5:52806800-52813000	6e-08	0.000543585	12	0.0297767	14	0.0347395	6	0.0148883	8	0.0198511	chr5_52807561_T_TA (7)	12	0.035503	14	0.0414201	6	0.0177515	8	0.0236686	chr5_52807561_T_TA (7)	0	0	0	0	0	0	0	0		9	0.0351562	11	0.0429688	4	0.015625	7	0.0273438	chr5_52807561_T_TA (6)	9	0.0387931	11	0.0474138	4	0.0172414	7	0.0301724	chr5_52807561_T_TA (6)	0	0
GENEHANCER_BRAIN|GH01J096361|chr1:96359601-96366599	3.7e-07	0.00268169	13	0.0322581	20	0.0496278	15	0.0372208	5	0.0124069	chr1_96366552_T_TA (3)	11	0.0325444	18	0.0532544	13	0.0384615	5	0.0147929	chr1_96366552_T_TA (3)	2	0.0307692	2	0.0307692	2	0.0307692	0	0		7	0.0273438	11	0.0429688	8	0.03125	3	0.0117188	chr1_96366552_T_TA (1)	6	0.0258621	10	0.0431034	7	0.0301724	3	0.012931	chr1_96366552_T_TA (1)	1	0.0416667
GENEHANCER_BRAIN|GH02J036555|chr2:36555129-36571533	6.1e-07	0.0036843	23	0.057072	49	0.121588	32	0.0794045	17	0.0421836	chr2_36558524_T_TA (4);chr2_36558524_TA_T (5)	19	0.056213	45	0.133136	29	0.0857988	16	0.0473373	chr2_36558524_T_TA (4);chr2_36558524_TA_T (5)	4	0.0615385	4	0.0615385	3	0.0461538	1	0.0153846		15	0.0585938	35	0.136719	25	0.0976562	10	0.0390625	chr2_36558524_T_TA (3);chr2_36558524_TA_T (3)	12	0.0517241	32	0.137931	23	0.0991379	9	0.0387931	chr2_36558524_T_TA (3);chr2_36558524_TA_T (3)	3	0.125
[truncated: 61 more columns]

## Sheet: ST8 - ecDNA
Supplementary Table 8: Extrachromosomal DNA (ecDNA) detected across glioma subtypes and its contribution to common oncogene amplification.
A) Counts of tumours carrying at least one ecDNA amplicon across tumour subtypes (e.g. tumour counted as “Circular” if ≥ 1 circularised amplicon detected, otherwise “BFB” if ≥ 1 BFB amplicon detected until “No amp” where no valid amplicon detected)
Subtype	Circular	BFB	Complex	Linear	No amp/invalid
GBM (n=256)	137	2	18	11	87
Astrocytoma, IDH mutant (n=89)	6	0	17	0	66
Oligodendroglioma (n=58)	1	0	1	0	56
B) ecDNA classification of commonly amplified oncogenes in glioma subtypes. Classification was restricted to gene amplifications with a total copy number ≥ 5 in diploid tumours and ≥ 10 in tetraploid tumours (i.e. “big gains”).
	GBM (n=256)						Astrocytoma, IDH mutant (n=89)						Oligodendroglioma (n=58)
Gene	Total gain	Circular	BFB	Complex	Linear	No amp/invalid	Total gain	Circular	BFB	Complex	Linear	No amp/invalid	Total gain	Circular	BFB	Complex	Linear	No amp/invalid
MDM2	18	14	0	2	0	2	0	0	0	0	0	0	0	0	0	0	0	0
MYC	5	1	0	3	0	1	2	0	0	0	0	2	0	0	0	0	0	0
EGFR	115	81	1	12	6	15	1	0	0	0	0	1	0	0	0	0	0	0
CDK4	26	23	0	1	0	2	2	2	0	0	0	0	0	0	0	0	0	0
ERBB2	1	0	0	0	0	1	0	0	0	0	0	0	0	0	0	0	0	0
SOX2	5	2	1	0	1	1	0	0	0	0	0	0	0	0	0	0	0	0
TERT	1	0	0	0	0	1	0	0	0	0	0	0	0	0	0	0	0	0
CCND1	1	1	0	0	0	0	0	0	0	0	0	0	0	0	0	0	0	0
E2F3	2	2	0	0	0	0	0	0	0	0	0	0	0	0	0	0	0	0
CCNE1	2	1	0	0	0	1	0	0	0	0	0	0	1	0	0	1	0	0
CDK6	9	1	0	4	0	4	0	0	0	0	0	0	0	0	0	0	0	0
MDM4	18	13	0	1	1	3	0	0	0	0	0	0	0	0	0	0	0	0
NEDD9	0	0	0	0	0	0	0	0	0	0	0	0	0	0	0	0	0	0
MCL1	1	0	0	1	0	0	0	0	0	0	0	0	0	0	0	0	0	0
AKT3	3	1	0	1	0	1	0	0	0	0	0	0	0	0	0	0	0	0
BCL2L1	0	0	0	0	0	0	0	0	0	0	0	0	0	0	0	0	0	0
ZNF217	0	0	0	0	0	0	0	0	0	0	0	0	0	0	0	0	0	0
KRAS	3	1	0	1	1	0	5	0	0	3	0	2	0	0	0	0	0	0
PDGFRA	19	8	0	3	4	4	2	0	0	1	0	1	0	0	0	0	0	0
AKT1	2	2	0	0	0	0	0	0	0	0	0	0	0	0	0	0	0	0
MYCL	2	1	0	0	0	1	0	0	0	0	0	0	1	0	0	0	0	1
NKX2-1	0	0	0	0	0	0	0	0	0	0	0	0	0	0	0	0	0	0
IGF1R	2	0	0	1	0	1	0	0	0	0	0	0	0	0	0	0	0	0
PAX8	2	0	0	2	0	0	0	0	0	0	0	0	0	0	0	0	0	0
Total	237	152	2	32	13	38	12	2	0	4	0	6	2	0	0	1	0	1
C) Association between tumours with ≥ 1 circularised amplicon detected and presence of chromothripsis
Significance was assessed using Fisher's exact test.
		Diffuse glioma (n=403)							GBM (n=256)							Astrocytoma (n=89)							Oligodendroglioma (n=58)
		Carrier counts				Fisher's exact test			Carrier counts				Fisher's exact test			Carrier counts				Fisher's exact test			Carrier counts				Fisher's exact test
Query 1	Query 2	11	10	01	00	P-value	OR	Relationship	11	10	01	00	P-value	OR	Relationship	11	10	01	00	P-value	OR	Relationship	11	10	01	00	P-value	OR	Relationship
Chromothripsis	Circular ecDNA	114	122	30	137	1.80694e-10	4.26721	CO_OCCURRENCE	109	76	28	43	0.00758827	2.20254	CO_OCCURRENCE	5	44	1	39	0.217413	4.43182	NA	0	2	1	55	1	0	NA

## Sheet: ST9 - Arm-level CNAs
Supplementary Table 9: Arm-level copy number gains and deletion
	Significantly enriched (q<0.05) copy number gain (Amp)
	Significantly enriched (q<0.05) copy number loss (Del)
		Diffuse glioma (n=403)								GBM (n=256)								Astrocytoma, IDH mutant (n=89)								Oligodendroglioma (n=58)
Arm	# Genes	Amp frequency	Amp frequency score	Amp z-score	Amp q-value	Del frequency	Del frequency score	Del z-score	Del q-value	Amp frequency	Amp frequency score	Amp z-score	Amp q-value	Del frequency	Del frequency score	Del z-score	Del q-value	Amp frequency	Amp frequency score	Amp z-score	Amp q-value	Del frequency	Del frequency score	Del z-score	Del q-value	Amp frequency	Amp frequency score	Amp z-score	Amp q-value	Del frequency	Del frequency score	Del z-score	Del q-value
1p	3092	0.05	0.06	1.96	0.084	0.14	0.15	10.6	0	0.07	0.07	2.58	0.02	0.02	0.03	-0.986	0.997	0.03	0.03	0.111	0.992	0	0	-1.68	0.99	0.02	0.12	2.38	0.0873	0.86	0.88	50.5	0
1q	2863	0.07	0.07	2.75	0.0133	0.01	0.01	-2.8	0.999	0.1	0.1	4.84	3.28e-06	0.01	0.01	-2.4	0.997	0.03	0.03	-0.0972	0.992	0.02	0.02	-0.652	0.99	0	0	-1.03	0.918	0.02	0.02	-0.0539	0.918
2p	1500	0.03	0.03	-2.52	1	0.03	0.03	-2.52	0.999	0.04	0.04	-0.9	0.999	0.02	0.02	-2.26	0.997	0.01	0.01	-1.99	0.992	0.04	0.05	-0.741	0.99	0	0	-1.24	0.918	0.02	0.02	-0.425	0.918
2q	2495	0.03	0.03	-1.98	1	0.03	0.03	-1.75	0.999	0.04	0.04	-0.54	0.999	0.02	0.02	-1.44	0.997	0.01	0.01	-1.47	0.992	0.03	0.03	-0.458	0.99	0	0	-1.09	0.918	0.02	0.02	-0.167	0.918
3p	1531	0.04	0.04	-1.51	1	0.06	0.06	-0.0584	0.999	0.04	0.05	-0.499	0.999	0.05	0.05	-0.226	0.997	0.04	0.05	-0.494	0.992	0.11	0.12	2.01	0.112	0	0	-1.24	0.918	0	0	-1.24	0.918
3q	1708	0.05	0.05	-0.579	1	0.03	0.03	-1.85	0.999	0.07	0.07	1.57	0.211	0.03	0.03	-1.48	0.997	0.01	0.01	-1.87	0.992	0.06	0.06	-0.148	0.99	0	0	-1.22	0.918	0	0	-1.22	0.918
4p	693	0.03	0.03	-2.67	1	0.07	0.08	0.792	0.536	0.02	0.03	-2.31	0.999	0.06	0.06	-0.0177	0.997	0.07	0.07	-0.377	0.992	0.04	0.05	-1.12	0.99	0	0	-1.24	0.918	0.17	0.17	6.23	1.85e-09
4q	1467	0.02	0.02	-2.82	1	0.07	0.07	1.1	0.418	0.02	0.02	-2.02	0.999	0.03	0.03	-1.47	0.997	0.01	0.01	-1.92	0.992	0.1	0.1	1.39	0.3	0	0	-1.13	0.918	0.19	0.19	7.76	5.48e-14
5p	456	0.03	0.03	-3.41	1	0.03	0.03	-3.03	0.999	0.04	0.04	-1.73	0.999	0.02	0.02	-2.48	0.997	0.01	0.01	-2.42	0.992	0.07	0.07	-0.619	0.99	0	0	-1.39	0.918	0	0	-1.39	0.918
5q	2185	0.02	0.02	-2.49	1	0.02	0.02	-2.71	0.999	0.04	0.04	-0.786	0.999	0.01	0.01	-2.54	0.997	0	0	-2.12	0.992	0.06	0.06	0.24	0.99	0	0	-1.15	0.918	0	0	-1.15	0.918
6p	1664	0.01	0.01	-3.64	1	0.06	0.06	-0.0558	0.999	0.01	0.01	-2.98	0.999	0.07	0.07	1.45	0.244	0.03	0.03	-1.05	0.992	0.02	0.02	-1.48	0.99	0	0	-1.2	0.918	0.03	0.03	0.451	0.869
6q	1304	0.01	0.01	-3.83	1	0.13	0.13	5.93	6.93e-09	0.01	0.01	-2.93	0.999	0.15	0.16	6.97	9.09e-12	0.02	0.03	-1.53	0.992	0.11	0.11	1.69	0.182	0	0	-1.24	0.918	0.05	0.05	1.14	0.39
7p	926	0.59	0.59	42.8	0	0.01	0.02	-2.11	0.999	0.84	0.85	53.3	0	0.01	0.07	0.438	0.778	0.24	0.24	5.69	6.23e-08	0.01	0.01	-1.93	0.99	0	0	-1.33	0.918	0	0	-1.33	0.918
7q	1717	0.61	0.61	48.3	0	0.01	0.02	-2	0.999	0.83	0.83	56.6	0	0	0	-1.5	0.997	0.34	0.35	11.2	0	0.03	0.05	-0.308	0.99	0	0	-1.22	0.918	0	0	-1.22	0.918
8p	795	0.04	0.05	-1.47	1	0.05	0.05	-1.08	0.999	0.05	0.06	-0.287	0.999	0.08	0.08	1.25	0.302	0.03	0.03	-1.58	0.992	0.01	0.01	-2.33	0.99	0.02	0.02	-0.561	0.918	0.02	0.02	-0.561	0.918
8q	1249	0.08	0.08	1.77	0.119	0.03	0.03	-2.28	0.999	0.06	0.06	0.154	0.999	0.04	0.05	-0.645	0.997	0.19	0.19	4.52	2.5e-05	0.01	0.01	-1.87	0.99	0.03	0.04	0.344	0.918	0.02	0.02	-0.446	0.918
9p	621	0.03	0.04	-1.62	1	;c	0.27	16.1	0	0.03	0.04	-0.962	0.999	0.29	0.3	15.4	0	0.06	0.08	-0.222	0.992	0.26	0.27	6.32	1.76e-09	0.03	0.04	0.413	0.918	0.17	0.18	6.33	1.23e-09
9q	1610	0.05	0.05	-0.167	1	0.04	0.05	-0.794	0.999	0.06	0.06	0.358	0.999	0.03	0.03	-1.29	0.997	0.07	0.07	0.273	0.992	0.03	0.04	-0.996	0.99	0.05	0.06	1.55	0.407	0.14	0.15	5.64	4.83e-08
10p	767	0.05	0.11	2.3	0.0426	0.54	0.57	39.3	0	0.01	0.05	-0.273	0.999	0.84	0.85	52.5	0	0.2	0.2	4.29	5.9e-05	0.01	0.01	-2.05	0.99	0	0	-1.33	0.918	0.03	0.03	0.179	0.918
10q	1968	0.01	0.02	-1.99	1	0.59	0.59	48	0	0.01	0.07	0.511	0.938	0.89	0.89	62.2	0	0.01	0.01	-1.67	0.992	0.1	0.1	1.94	0.117	0	0	-1.16	0.918	0.03	0.03	0.557	0.825
11p	1162	0.04	0.05	-1.12	1	0.06	0.07	0.281	0.916	0.04	0.04	-1.06	0.999	0.03	0.03	-1.59	0.997	0.02	0.03	-1.45	0.992	0.19	0.2	4.45	4.22e-05	0.1	0.1	3.47	0.00349	0	0	-1.23	0.918
11q	2133	0.06	0.06	0.991	0.429	0.04	0.04	-1.22	0.999	0.02	0.02	-1.62	0.999	0.05	0.05	0.12	0.997	0.1	0.1	2.11	0.0782	0	0	-2.09	0.99	0.14	0.14	5.94	2.93e-08	0	0	-1.07	0.918
12p	804	0.08	0.09	1.53	0.181	0.03	0.04	-2.36	0.999	0.06	0.06	-0.167	0.999	0.04	0.04	-1.45	0.997	0.19	0.2	4	0.000182	0.02	0.03	-1.62	0.99	0.02	0.02	-0.559	0.918	0.02	0.02	-0.559	0.918
12q	2055	0.04	0.04	-0.93	1	0.04	0.04	-1.37	0.999	0.03	0.03	-1.14	0.999	0.02	0.02	-2.01	0.997	0.08	0.09	1.29	0.393	0.08	0.09	1.29	0.328	0	0	-1.14	0.918	0.05	0.05	1.47	0.237
13q	1092	0.01	0.02	-3.39	1	0.23	0.23	13.5	0	0.01	0.02	-2.33	0.999	0.29	0.3	16.3	0	0.01	0.01	-2	0.992	0.16	0.16	3.08	0.00691	0	0	-1.26	0.918	0.07	0.07	1.85	0.117
14q	1829	0.01	0.02	-2.91	1	0.17	0.18	10.8	0	0.02	0.02	-1.92	0.999	0.22	0.22	12.4	0	0.01	0.01	-1.69	0.992	0.13	0.14	3.14	0.00671	0	0	-1.14	0.918	0.1	0.1	3.92	0.000175
15q	2082	0.01	0.02	-3.09	1	0.07	0.07	1.97	0.089	0.02	0.02	-2.18	0.999	0.08	0.08	2.44	0.0333	0.02	0.02	-1.26	0.992	0.01	0.01	-1.72	0.99	0	0	-1.08	0.918	0.14	0.14	5.88	1.35e-08
16p	1378	0.02	0.02	-3.45	1	0.03	0.03	-2.22	0.999	0.01	0.01	-2.89	0.999	0.04	0.04	-0.999	0.997	0.04	0.05	-0.799	0.992	0.02	0.02	-1.62	0.99	0	0	-1.27	0.918	0	0	-1.27	0.918
16q	1070	0.01	0.02	-3.79	1	0.05	0.05	-1	0.999	0.01	0.01	-3.23	0.999	0.07	0.07	0.709	0.598	0.04	0.05	-0.971	0.992	0.03	0.04	-1.36	0.99	0	0	-1.31	0.918	0	0	-1.31	0.918
17p	937	0.09	0.09	2.11	0.0632	0.07	0.08	0.934	0.467	0.05	0.05	-0.416	0.999	0.09	0.1	2.43	0.0333	0.25	0.26	6.24	2.87e-09	0.03	0.04	-0.982	0.99	0	0	-1.3	0.918	0.03	0.03	0.227	0.918
17q	2298	0.09	0.09	3.42	0.00158	0.02	0.02	-2.66	0.999	0.08	0.08	2.71	0.015	0.03	0.03	-1.12	0.997	0.11	0.11	2.82	0.0119	0	0	-2	0.99	0.03	0.04	0.708	0.918	0.02	0.02	-0.188	0.918
18p	212	0.04	0.05	-1.94	1	0.08	0.09	1.02	0.441	0.04	0.04	-1.4	0.999	0.08	0.08	1.05	0.394	0.08	0.08	-0.27	0.992	0.06	0.06	-0.968	0.99	0	0	-1.32	0.918	0.14	0.14	4.4	2.41e-05
18q	644	0.04	0.05	-1.44	1	0.08	0.08	1.24	0.357	0.05	0.06	-0.361	0.999	0.08	0.08	1.41	0.244	0.06	0.06	-0.803	0.992	0.04	0.05	-1.17	0.99	0	0	-1.27	0.918	0.14	0.14	4.68	7.19e-06
19p	1331	0.29	0.3	19.9	0	0.04	0.05	-0.765	0.999	0.43	0.45	27.1	0	0.03	0.06	0.061		0.07	0.07	0.108	0.992	0.06	0.06	-0.296	0.99	0	0	-1.27	0.918	0	0	-1.27	0.918
19q	2402	0.24	0.29	20.7	0	0.19	0.25	16.7	0	0.36	0.38	25.4	0	0.04	0.07	1.48	0.244	0.02	0.03	-0.74	0.992	0.19	0.2	6.64	3.05e-10	0.02	0.09	1.62	0.407	0.81	0.82	42.4	0
20p	583	0.21	0.21	11.3	0	0.03	0.03	-2.38	0.999	0.29	0.3	15.6	0	0.03	0.04	-0.964	0.997	0.1	0.1	0.687	0.895	0.03	0.04	-1.5	0.99	0	0	-1.37	0.918	0	0	-1.37	0.918
20q	1092	0.19	0.19	10.6	0	0.01	0.02	-3.28	0.999	0.28	0.29	15.8	0	0.02	0.03	-1.71	0.997	0.06	0.06	-0.598	0.992	0.01	0.01	-2.16	0.99	0	0	-1.31	0.918	0	0	-1.31	0.918
21q	750	0.06	0.06	-0.77	1	0.03	0.03	-2.51	0.999	0.07	0.07	0.518	0.938	0.02	0.02	-2.8	0.997	0.04	0.05	-1.03	0.992	0.09	0.09	0.458	0.99	0.02	0.02	-0.57	0.918	0.02	0.02	-0.57	0.918
22q	1258	0.02	0.02	-2.81	1	0.17	0.17	9.11	0	0.01	0.02	-2.45	0.999	0.23	0.23	12.2	0	0.03	0.04	-1.04	0.992	0.15	0.15	2.95	0.00905	0.05	0.05	1.12	0.747	0	0	-1.25	0.918
Xp	945	0.58	0.63	44.2	0	0.07	0.16	4.84	2.61e-06	0.64	0.66	40.1	0	0.04	0.11	2.05	0.0809	0.53	0.64	18.2	0	0.18	0.38	7.42	2.31e-12	0.47	0.47	19.9	0	0.02	0.03	0.0941	0.918

## Sheet: ST10 - Focal CNAs
Supplementary Table 10: Focal copy number gains (AMP) and deletions (DEL)
Ambiguous: unclear whether oncogene or TSG
GBM peak TCGA GISTIC: overlap in 1+ gene from this GISTIC analysis with TCGA GBM GISTIC analysis (Zack et al., 2013, Nature Genetics)
Pan-cancer peak TCGA GISTIC: overlap in 1+ gene from this GISTIC analysis with TCGA CRC GISTIC analysis (Zack et al., 2013, Nature Genetics)
GBM highlighted: TCGA GISTIC: Prioritised candidate in GBM peak GISTIC analysis in TCGA (Zack et al., 2013, Nature Genetics)
Pan-cancer highlighted: TCGA GISTIC: Prioritised candidate in pan-cancer peak GISTIC analysis in TCGA (Zack et al., 2013, Nature Genetics)
Diffuse glioma (n=403)
TYPE	LOCUS	WIDE_PEAK	PEAK	REGION	Q	Q_RESIDUAL	N_CNA	FREQ_CNA	WIDE_PEAK_SIZE_MB	N_GENES	CGC_ONCOGENE	CGC_TSG	CGC_AMBIGUOUS	MUT_ONCOGENE	MUT_TSG	MUT_AMBIGUOUS	TCGA_TUMOUR_PEAK	TCGA_TUMOUR_HIGHLIGHTED	TCGA_PANCAN_PEAK	TCGA_PANCAN_HIGHLIGHTED	CONSENSUS
AMP	1p36.21	chr1:12007237-27589363	chr1:12804172-13804181	chr1:12804172-14245027	0.042193	0.042193	21	0.0525	15.5821	288		CASP9;ID3;PRDM2;ARID1A;SPEN;ARHGEF10L	PAX7;MDS2		ARID1A		YES	PRDM2			-
AMP	1q32.1	chr1:204381896-204682094	chr1:204390050-204672273	chr1:202990011-205538585	1.9572e-18	1.9572e-18	50	0.125	0.300198	4	MDM4						YES	MDM4	YES	MDM4	MDM4
AMP	2p24.3	chr2:15914158-16152974	chr2:15975694-16150116	chr2:15923613-16164426	0.042193	0.042193	18	0.045	0.238816	4	MYCN						YES	MYCN			MYCN
AMP	3p25.3	chr3:1-11119649	chr3:10657964-10740827	chr3:1-11135353	0.0031371	0.0031371	23	0.0575	11.1196	80		VHL	SRGAP3								-
AMP	3q26.33	chr3:181675246-181930066	chr3:181785396-181816886	chr3:165657583-198295559	1.4844e-17	1.4844e-17	46	0.115	0.25482	2	SOX2						YES	SOX2	YES	SOX2	SOX2
AMP	4q12	chr4:53714219-54545423	chr4:53894351-54098232	chr4:49079166-59751240	1.2177e-24	1.2177e-24	37	0.0925	0.831204	5	PDGFRA		CHIC2	PDGFRA			YES	PDGFRA	YES	PDGFRA	PDGFRA
AMP	5q35.2	chr5:166385607-181538259	chr5:173419791-173478701	chr5:173419791-173507557	0.19494	0.19494	14	0.035	15.1527	184	FGFR4;FLT4;NPM1;TLX3		NSD1		TENM2				YES		-
AMP	7p11.2	chr7:54546893-55517652	chr7:54578630-55514352	chr7:51816681-86305511	2.9473e-46	2.0504e-36	240	0.6	0.970759	9	EGFR			EGFR			YES		YES	EGFR	EGFR
AMP	7p11.2	chr7:54603686-55596093	chr7:54607640-55534665	chr7:51816681-86305511	5.7555e-28	1.6086e-11	237	0.5925	0.992407	7	EGFR			EGFR			YES		YES	EGFR	EGFR
AMP	7q11.23	chr7:63172451-81114225	chr7:74410195-75566188	chr7:51816681-86305511	9.8126e-05	0.0043645	241	0.6025	17.9418	154	HIP1		ELN								-
AMP	7q21.2	chr7:82195444-106799495	chr7:92612138-93029277	chr7:88801142-96738463	0.00048228	0.14405	244	0.61	24.6041	258	CDK6;CUX1;GRM3;TRRAP	CUX1	AKAP9	TRRAP			YES	CDK6	YES	CDK6	CDK6
AMP	7q36.1	chr7:148011230-156536820	chr7:149802677-150065376	chr7:128613044-159345973	8.2579e-07	6.6959e-05	252	0.63	8.52559	96	EZH2	EZH2;CNTNAP2;KMT2C					YES	DPP6;KMT2C	YES		-
AMP	8q24.21	chr8:123101253-130098039	chr8:126860945-129301312	chr8:109791762-145138636	1.4942e-06	1.4942e-06	46	0.115	6.99679	66	MYC						YES	MYC	YES	MYC	MYC
AMP	9p13.2	chr9:35651629-37485766	chr9:36315076-36635283	chr9:35661383-37504184	0.019788	0.019788	23	0.0575	1.83414	37	PAX5	PAX5							YES		-
AMP	9q34.11	chr9:127377148-127875703	chr9:127677264-127741790	chr9:121682837-138394717	6.9708e-05	0.0039472	35	0.0875	0.498555	22											-
AMP	9q34.3	chr9:128574181-138394717	chr9:136766787-136854030	chr9:121682837-138394717	0.0001172	0.014653	34	0.085	9.82054	246	ABL1;NOTCH1;SET;BRD3	NOTCH1;TSC1	RALGDS;NUP214;FNBP1			NOTCH1					-
AMP	10p15.3	chr10:1-17415366	chr10:1-1531558	chr10:1-2090777	0.087544	0.087544	26	0.065	17.4154	142	GATA3	KLF6;GATA3;LARP4B							YES		GATA3
AMP	11q25	chr11:132802105-135086622	chr11:134151965-134297330	chr11:132251992-135086622	0.0013861	0.0013861	33	0.0825	2.28452	17											-
AMP	12p13.32	chr12:2246377-8815032	chr12:3152569-3296356	chr12:2255520-8013998	0.0043426	0.0043426	39	0.0975	6.56865	122	CCND2;CHD4	PTPN6	ZNF384				YES	CCND2			CCND2
AMP	12p11.21	chr12:31130980-31238714	chr12:31144110-31230999	chr12:31059483-31287317	0.0069005	0.0069005	33	0.0825	0.107734	1											-
AMP	12q14.1	chr12:57683066-57874115	chr12:57704407-57772619	chr12:57146969-61682506	2.1046e-39	3.554e-38	45	0.1125	0.191049	14							YES	CDK4	YES	CDK4	CDK4
AMP	12q15	chr12:64633094-71147763	chr12:67953284-68129690	chr12:64971718-71167573	7.7724e-05	0.12667	21	0.0525	6.51467	59	MDM2;HMGA2	PTPRB;WIF1					YES	MDM2	YES	MDM2	MDM2
AMP	12q24.33	chr12:114685934-133275309	chr12:132325055-133275309	chr12:132267024-133275309	0.029871	0.066685	20	0.05	18.5894	209		POLE;HNF1A;NCOR2;SETD1B	BCL7A;CLIP1;ZCCHC8	TMEM132C	SETD1B						-
AMP	13q33.3	chr13:90911309-114364328	chr13:109190354-110060409	chr13:103485440-110278737	0.00017203	0.20397	16	0.04	23.453	180		GPC5;SOX21					YES	IRS2	YES		-
AMP	13q34	chr13:113270173-113799535	chr13:113325566-113742150	chr13:110346617-114364328	9.8126e-05	0.0032726	16	0.04	0.529362	12									YES		-
AMP	15q26.1	chr15:62980938-101991189	chr15:89022602-89270286	chr15:89022602-89297162	0.14408	0.14408	12	0.03	39.0103	466	FES;IDH2;NTRK3;MAP2K1	CHD2;FES;SMAD3;PML;POLG	CRTC3	IDH2			YES		YES	IGF1R	IDH2
AMP	16q22.1	chr16:70077634-71268551	chr16:70086230-70583851	chr16:70086230-70610252	0.14041	0.14041	11	0.0275	1.19092	21											-
AMP	17q25.1	chr17:75548829-76376752	chr17:75779745-76120309	chr17:74954779-80170351	0.00010723	0.00010723	44	0.11	0.827923	33	H3-3B								YES		-
AMP	19p13.3	chr19:1794204-2504314	chr19:2012479-2136013	chr19:1-3412691	3.2901e-05	8.6396e-05	124	0.31	0.71011	34											-
AMP	19p13.11	chr19:14240724-19497291	chr19:18824465-18930213	chr19:16301402-19516270	0.0036789	0.010628	122	0.305	5.25657	158	JAK3;CRTC1;BRD4	ELL	DNAJB1;TPM4						YES		-
AMP	22q11.21	chr22:18113222-21730028	chr22:20400809-20870808	chr22:20388203-21618575	0.042193	0.042193	16	0.04	3.61681	96	DGCR8	LZTR1;CLTCL1	SEPTIN5		LZTR1				YES		-
DEL	1p36.32	chr1:4334245-6517704	chr1:5162537-5270178	chr1:1-15838547	4.9241e-20	0.0009941	108	0.27	2.18346	20		RPL22					YES	CHD5			-
DEL	1p36.23	chr1:7829796-8834571	chr1:7978296-8054258	chr1:1-15838547	3.3359e-26	3.5941e-17	113	0.2825	1.00477	9							YES		YES		-
DEL	1p22.1	chr1:89815975-107057972	chr1:92606713-92667955	chr1:91980842-93530308	0.042115	0.15294	71	0.1775	17.242	104		RPL5					YES	RPL5;MTF2			-
DEL	1q41	chr1:209192010-236138976	chr1:219964392-220118516	chr1:219550258-227331971	0.016024	0.36135	23	0.0575	26.947	257	H3-3A						YES		YES		-
DEL	1q43	chr1:219568441-241557048	chr1:237350018-237597252	chr1:236838104-239933554	0.020625	0.17849	22	0.055	21.9886	208	H3-3A		RGS7				YES				-
DEL	2q37.1	chr2:232620371-233183667	chr2:232784451-232814075	chr2:225496958-242193529	2.9115e-10	2.9115e-10	45	0.1125	0.563296	7							YES				-
DEL	3q29	chr3:192375142-198295559	chr3:195126205-195505845	chr3:192380321-198295559	0.0090994	0.0090994	24	0.06	5.92042	85	MUC4		TFRC;MB21D2				YES				-
DEL	4q34.3	chr4:180897019-181262227	chr4:180997572-181145292	chr4:175674380-190214555	3.3134e-05	0.015572	48	0.12	0.365208	1							YES		YES		-
DEL	4q35.1	chr4:176487115-190214555	chr4:182445749-182724588	chr4:175674380-190214555	0.00036384	0.088454	49	0.1225	13.7274	69		CASP3;FAT1					YES	FAT1;ING2	YES	FAT1	FAT1
DEL	5q34	chr5:165261856-165594210	chr5:165332103-165423685	chr5:165271721-165609432	0.065711	0.065711	21	0.0525	0.332354	1											-
DEL	6q22.31	chr6:116603820-127678527	chr6:118503891-118603836	chr6:115093895-169752955	0.00051469	0.0033445	72	0.18	11.0747	55	ROS1;RSPO3		GOPC				YES	NKAIN2	YES		-
DEL	6q26	chr6:160975502-165659276	chr6:163269605-163591827	chr6:115093895-169752955	2.1281e-07	1.3645e-05	74	0.185	4.68377	16	QKI	QKI					YES	QKI	YES	PRKN	QKI
DEL	8p23.2	chr8:1-7391950	chr8:3016188-3140205	chr8:3016188-3155786	0.1883	0.1883	32	0.08	7.39195	53		ARHGEF10					YES	CSMD1	YES		-
DEL	9p21.3	chr9:21143392-21880889	chr9:21274139-21517302	chr9:7862900-68433476	3.7523e-118	4.0592e-09	194	0.485	0.737497	19							YES				-
DEL	9p21.3	chr9:21884054-22404480	chr9:21892401-22399509	chr9:7862900-68433476	1.4629e-156	8.5606e-126	200	0.5	0.520426	4		CDKN2A			CDKN2A		YES	CDKN2A;CDKN2B	YES	CDKN2A;CDKN2B	CDKN2A
DEL	10q23.31	chr10:87832261-88062808	chr10:87903815-87977796	chr10:87707754-88531626	0.0032007	0.0080435	240	0.6	0.230547	2		PTEN			PTEN		YES	PTEN	YES	PTEN	PTEN
DEL	10q26.3	chr10:110558679-133797422	chr10:129238348-129764329	chr10:112765020-132834901	0.0041388	0.010746	248	0.62	23.2387	196	FGFR2;TCF7L2	MGMT	SHTN1;VTI1A				YES		YES		MGMT
DEL	11p15.5	chr11:1-4020159	chr11:1748995-2136948	chr11:1-4954207	0.0032976	0.0032976	45	0.1125	4.02016	128	HRAS;NUP98	CARS1					YES	HRAS;IGF2;NUP98;SIRT3;PHRF1;MIR483	YES		-
DEL	12q12	chr12:41815899-48754660	chr12:44279023-45857770	chr12:43227799-46899941	0.028882	0.028882	35	0.0875	6.93876	58		ARID2	COL2A1		ARID2		YES	ARID2			ARID2
DEL	13q14.3	chr13:48092879-58212252	chr13:51672724-52003482	chr13:47849562-58987446	0.0018478	0.0018478	112	0.28	10.1194	75	CYSLTR2	RB1			RB1		YES	RB1;PHF11;SETDB2	YES	RB1	RB1
DEL	14q13.1	chr14:1-36660111	chr14:33264684-33561664	chr14:33264684-33574540	0.18359	0.23864	72	0.18	36.6601	236	ARHGAP5;NKX2-1	NKX2-1;BAZ1A;CCNB1IP1					YES	NPAS3	YES		-
DEL	14q32.2	chr14:90513445-104536725	chr14:98301975-98439744	chr14:90522724-104556530	0.0015737	0.0024037	84	0.21	14.0233	252	TCL1A;BCL11B	DICER1;BCL11B	HSP90AA1;TRIP11;GOLGA5						YES		-
DEL	15q14	chr15:33878327-49699748	chr15:37174464-37912591	chr15:33887742-49131980	0.0036388	0.0036388	46	0.115	15.8214	189	KNSTRN;NUTM1	B2M;KNL1	HMGN2P46				YES	B2M;TP53BP1	YES		B2M
DEL	16p12.2	chr16:20408737-28247247	chr16:21944044-22699472	chr16:21944044-22728352	0.21811	0.21811	25	0.0625	7.83851	82			PRKCB;IL21R				YES				-
DEL	17q11.2	chr17:29798447-32186000	chr17:31115861-31177579	chr17:30564471-31547373	0.036737	0.37849	23	0.0575	2.38755	36	SUZ12	NF1;SUZ12			NF1		YES	NF1	YES	NF1	NF1
DEL	17q21.1	chr17:33238366-43021235	chr17:39697953-40056109	chr17:37675300-42412611	0.042115	0.1276	25	0.0625	9.78287	284	CCR7;ERBB2;RARA;STAT3;STAT5B;TAF15	STAT5B;CDK12	LASP1;MLLT6							BRCA1	BRCA1
DEL	22q13.31	chr22:40583700-50818468	chr22:45449749-45586902	chr22:45289122-45738130	0.1276	0.1276	81	0.2025	10.2348	172		EP300					YES		YES		-
GBM (n=256)
TYPE	LOCUS	WIDE_PEAK	PEAK	REGION	Q	Q_RESIDUAL	N_CNA	FREQ_CNA	WIDE_PEAK_SIZE_MB	N_GENES	CGC_ONCOGENE	CGC_TSG	CGC_AMBIGUOUS	MUT_ONCOGENE	MUT_TSG	MUT_AMBIGUOUS	TCGA_TUMOUR_PEAK	TCGA_TUMOUR_HIGHLIGHTED	TCGA_PANCAN_PEAK	TCGA_PANCAN_HIGHLIGHTED	CONSENSUS
AMP	1p36.21	chr1:12794251-14236014	chr1:12804172-13804181	chr1:12804172-14273704	0.0075503	0.0075503	19	0.0750988	1.44176	29		PRDM2					YES	PRDM2			-
AMP	1q32.1	chr1:204381896-204682094	chr1:204390050-204672273	chr1:202171511-205621023	2.9876e-21	2.9876e-21	46	0.181818	0.300198	4	MDM4						YES	MDM4	YES	MDM4	MDM4
AMP	3q26.33	chr3:181505206-181930066	chr3:181785396-181816886	chr3:165657583-198295559	2.4501e-19	2.4501e-19	43	0.16996	0.42486	2	SOX2						YES	SOX2	YES	SOX2	SOX2
AMP	4q12	chr4:53865680-54569769	chr4:53894351-54098232	chr4:49293723-59751240	1.6925e-25	1.6925e-25	30	0.118577	0.704089	4	PDGFRA		CHIC2	PDGFRA			YES	PDGFRA	YES	PDGFRA	PDGFRA
AMP	5q35.2	chr5:173199626-174368208	chr5:173419791-173478701	chr5:173323233-173863555	0.052782	0.052782	14	0.055336	1.16858	11											-
AMP	6q27	chr6:143133587-170805979	chr6:167978169-168249987	chr6:167978169-168278794	0.23612	0.23612	8	0.0316206	27.6724	203	ESR1;AFDN;QKI	ESR1;LATS1;QKI;ARID1B	EZR;CEP43		ARID1B						-
AMP	7p11.2	chr7:54546893-55517652	chr7:54578630-55514352	chr7:51232379-96738463	2.0652e-54	8.7099e-43	221	0.873518	0.970759	9	EGFR			EGFR			YES		YES	EGFR	EGFR
AMP	7p11.2	chr7:54603686-55596093	chr7:54607640-55534665	chr7:51232379-96738463	7.8903e-34	1.4305e-14	218	0.86166	0.992407	7	EGFR			EGFR			YES		YES	EGFR	EGFR
AMP	7q11.23	chr7:63172451-80870392	chr7:74410195-75566188	chr7:51232379-96738463	1.1661e-07	0.00016858	220	0.869565	17.6979	154	HIP1		ELN								-
AMP	7q36.3	chr7:157413927-159345973	chr7:158782750-158885136	chr7:137408998-159345973	6.2085e-07	1.6226e-05	217	0.857708	1.93205	13									YES		-
AMP	9p13.2	chr9:32233649-38029225	chr9:36315076-36635283	chr9:36315076-36661768	0.22473	0.22473	14	0.055336	5.79558	119	PAX5	PAX5							YES		-
AMP	9q34.11	chr9:127377148-127875703	chr9:127677264-127741790	chr9:126584942-128555726	0.0047169	0.093119	21	0.083004	0.498555	22											-
AMP	9q34.3	chr9:135801875-137220953	chr9:136766787-136854030	chr9:130821989-138394717	0.0013905	0.0068471	22	0.0869565	1.41908	74	NOTCH1	NOTCH1				NOTCH1					-
AMP	12p11.21	chr12:31052605-31238714	chr12:31059483-31230999	chr12:31059483-31238714	0.16112	0.16112	17	0.0671937	0.186109	2											-
AMP	12q14.1	chr12:57683066-57874115	chr12:57704407-57772619	chr12:57146969-62804711	2.2932e-41	3.8084e-40	38	0.150198	0.191049	14							YES	CDK4	YES	CDK4	CKD4
AMP	12q15	chr12:64633094-71147763	chr12:67953284-68129690	chr12:64971718-71167573	2.0304e-06	0.028225	17	0.0671937	6.51467	59	MDM2;HMGA2	PTPRB;WIF1					YES	MDM2	YES	MDM2	MDM2
AMP	13q34	chr13:113270173-113799535	chr13:113325566-113742150	chr13:110746511-114364328	0.00015104	0.00015104	12	0.0474308	0.529362	12									YES		-
AMP	15q26.3	chr15:58673965-101991189	chr15:98704813-99085281	chr15:98704813-99101266	0.22792	0.22792	9	0.0355731	43.3172	496	FES;IDH2;NTRK3;MAP2K1	CHD2;FES;SMAD3;PML;POLG	CRTC3	IDH2			YES		YES	IGF1R	IDH2
AMP	17q25.1	chr17:74953052-76292390	chr17:75779745-76120309	chr17:74954779-76579712	0.00050341	0.00050341	30	0.118577	1.33934	55	H3-3B						YES		YES		-
AMP	19p13.3	chr19:1794204-2488368	chr19:2012479-2136013	chr19:1-3384625	0.00012905	0.00012905	116	0.458498	0.694164	34											-
AMP	20q13.31	chr20:57231910-57627836	chr20:57378627-57469205	chr20:57352417-57546513	0.095612	0.095612	77	0.304348	0.395926	9											-
AMP	22q11.21	chr22:1-22140804	chr22:20388203-20881442	chr22:20388203-20899774	0.13513	0.13513	7	0.027668	22.1408	136	MAPK1;DGCR8	LZTR1;CLTCL1	SEPTIN5		LZTR1				YES		-
DEL	1p36.31	chr1:4778675-6473636	chr1:6189340-6258479	chr1:1-36724619	6.495e-43	1.9823e-11	62	0.245059	1.69496	17		RPL22					YES	CHD5			-
DEL	1p36.23	chr1:7829796-8862857	chr1:7999029-8034985	chr1:1-36724619	1.4367e-48	1.5473e-27	62	0.245059	1.03306	9							YES		YES		-
DEL	1p22.1	chr1:90029541-103423116	chr1:92493524-92806492	chr1:89952950-101448400	0.00032111	0.0035618	21	0.083004	13.3936	91		RPL5					YES	RPL5;MTF2			-
DEL	1q41	chr1:210237825-234630726	chr1:220099440-220118516	chr1:211802074-236203201	4.5085e-05	0.014926	19	0.0750988	24.3929	223	H3-3A						YES		YES		-
DEL	1q43	chr1:236756002-240007810	chr1:237457655-237484459	chr1:236148587-240500803	0.00015446	0.0059242	17	0.0671937	3.25181	10											-
DEL	2q22.1	chr2:138890366-142882934	chr2:140223024-142157186	chr2:141059876-141089785	0.031035	0.086004	7	0.027668	3.99257	3		LRP1B					YES	LRP1B	YES		LRP1B
DEL	2q37.1	chr2:232577307-233252555	chr2:232862413-233032792	chr2:232058571-234003566	2.2586e-05	4.8863e-05	19	0.0750988	0.675248	8							YES				-
DEL	3q11.2	chr3:86495863-105375569	chr3:93999019-94078705	chr3:93931761-94898144	0.18141	0.18141	16	0.0632411	18.8797	69			EPHA3;TFG								-
DEL	3q29	chr3:191246572-197513841	chr3:193601310-195165489	chr3:191276355-197504043	0.0018543	0.0018543	14	0.055336	6.26727	79	MUC4		TFRC;MB21D2				YES				-
DEL	4q34.3	chr4:177975663-182148012	chr4:181053188-181179937	chr4:179774806-183063425	0.0013606	0.13821	19	0.0750988	4.17235	2							YES		YES		-
DEL	4q35.1	chr4:182166914-182899177	chr4:182233067-182822117	chr4:179774806-183063425	0.00010992	0.0013934	21	0.083004	0.732263	2							YES				-
DEL	5q34	chr5:163515863-166908702	chr5:164431405-164484381	chr5:164452116-164484381	0.076796	0.076821	10	0.0395257	3.39284	2											-
DEL	6q12	chr6:57256926-79494068	chr6:68040742-68644484	chr6:65378873-69517921	0.054035	0.21771	38	0.150198	22.2371	67											-
DEL	6q22.31	chr6:114332156-127443587	chr6:118534035-118571817	chr6:114551487-169752955	1.6478e-06	3.2816e-05	57	0.225296	13.1114	65	ROS1;RSPO3		GOPC				YES	NKAIN2	YES		-
DEL	6q26	chr6:161269570-165280764	chr6:162688503-163328409	chr6:114551487-169752955	5.691e-12	1.7391e-09	58	0.229249	4.01119	11	QKI	QKI					YES	QKI	YES	PRKN	QKI
DEL	9p21.3	chr9:21674669-22526708	chr9:21884054-22138743	chr9:1-68433476	3.4431e-272	3.4431e-272	166	0.656126	0.852039	6		CDKN2A			CDKN2A		YES	CDKN2A;CDKN2B	YES	CDKN2A;CDKN2B	CDKN2A
DEL	10q23.31	chr10:87706947-88278306	chr10:87832261-87986827	chr10:87511506-88992037	3.2322e-06	8.2457e-06	228	0.901186	0.571359	4		PTEN			PTEN		YES	PTEN	YES	PTEN	PTEN
DEL	10q26.3	chr10:96336155-133797422	chr10:129457037-129783900	chr10:128511192-129990776	0.054701	0.13821	229	0.905138	37.4613	359	FGFR2;TLX1;NFKB2;TCF7L2;NT5C2	MGMT;NFKB2;SUFU	SHTN1;VTI1A				YES		YES		MGMT
DEL	11q13.2	chr11:67679641-67998130	chr11:67777973-67822716	chr11:67803585-67822716	0.18316	0.18316	19	0.0750988	0.318489	1											-
DEL	12p12.2	chr12:9446295-22048367	chr12:20553696-20765834	chr12:20373248-21265102	0.043331	0.042621	17	0.0671937	12.6021	136		CDKN1B;ETV6					YES	CDKN1B	YES	CDKN1B	CDKN1B
DEL	12q12	chr12:40567942-48770852	chr12:43218111-43600176	chr12:43227799-43605358	0.089421	0.089421	16	0.0632411	8.20291	62		ARID2	COL2A1		ARID2		YES	ARID2			ARID2
DEL	13q14.2	chr13:48092879-55180040	chr13:48394495-48430110	chr13:46225433-57580710	0.00010885	0.00010885	86	0.339921	7.08716	69	CYSLTR2	RB1			RB1		YES	RB1;PHF11;SETDB2	YES	RB1	RB1
DEL	14q13.1	chr14:32824702-33928199	chr14:32925346-33817863	chr14:32749081-34292404	0.00028587	0.00047977	65	0.256917	1.1035	2							YES	NPAS3			-
DEL	14q32.31	chr14:69748254-107043718	chr14:100807090-102592720	chr14:93062089-102612655	0.054035	0.19266	60	0.237154	37.2955	445	AKT1;TSHR;TCL1A;BCL11B	DICER1;BCL11B	HSP90AA1;TRIP11;GOLGA5						YES		-
DEL	15q14	chr15:32731284-49160930	chr15:34966414-41446172	chr15:26354464-52376416	4.618e-05	4.618e-05	36	0.142292	16.4296	189	KNSTRN;NUTM1	B2M;KNL1	HMGN2P46				YES	B2M;TP53BP1	YES		B2M
DEL	16p12.2	chr16:20575429-27453642	chr16:21934219-22709099	chr16:20593796-25986092	0.0042298	0.0041874	23	0.0909091	6.87821	75			PRKCB;IL21R				YES				-
DEL	17q11.2	chr17:30552521-31537545	chr17:31083714-31240113	chr17:29119141-42738808	0.00048289	0.022302	22	0.0869565	0.985024	16		NF1			NF1		YES	NF1	YES	NF1	NF1
DEL	17q21.1	chr17:32993427-42758410	chr17:39690209-40030571	chr17:29119141-42738808	0.0013773	0.0079628	23	0.0909091	9.76498	265	CCR7;ERBB2;RARA;STAT3;STAT5B;TAF15	STAT5B;CDK12	LASP1;MLLT6								-
DEL	22q11.23	chr22:25222688-25569272	chr22:25310519-25472871	chr22:25302685-25529661	0.18141	0.18141	60	0.237154	0.346584	4											-
Astrocytoma, IDH mutant (n=89)
TYPE	LOCUS	WIDE_PEAK	PEAK	REGION	Q	Q_RESIDUAL	N_CNA	FREQ_CNA	WIDE_PEAK_SIZE_MB	N_GENES	CGC_ONCOGENE	CGC_TSG	CGC_AMBIGUOUS	MUT_ONCOGENE	MUT_TSG	MUT_AMBIGUOUS	TCGA_TUMOUR_PEAK	TCGA_TUMOUR_HIGHLIGHTED	TCGA_PANCAN_PEAK	TCGA_PANCAN_HIGHLIGHTED	CONSENSUS
AMP	2p25.1	chr2:6845506-7027333	chr2:6881219-7018100	chr2:6855434-7148099	0.022379	0.070227	5	0.0561798	0.181827	4											-
AMP	2p24.3	chr2:15967582-16152974	chr2:15975694-16150116	chr2:15800316-16164426	0.012631	0.059726	6	0.0674157	0.185392	1											-
AMP	3p26.3	chr3:1-27344238	chr3:1437345-1690232	chr3:1-27364237	0.0014859	0.0014859	9	0.101124	27.3442	182	RAF1	FBLN2;PPARG;VHL	SRGAP3								-
AMP	7q33	chr7:128605439-159345973	chr7:129673805-146403763	chr7:129564024-159345973	0.078514	0.078514	35	0.393258	30.7405	309	BRAF;EZH2;SMO;TRIM24;CREB3L2	EZH2;TRIM24;CNTNAP2;KMT2C	MNX1;FAM131B;KIAA1549	BRAF			YES	DPP6;KMT2C	YES		-
AMP	8q24.13	chr8:120915227-143246631	chr8:123656647-123768583	chr8:103923682-145138636	1.1052e-06	1.1052e-06	27	0.303371	22.3314	140	MYC	NDRG1	FAM135B				YES	MYC	YES	MYC	MYC
AMP	9q33.3	chr9:121174197-138394717	chr9:125309995-125999837	chr9:125309995-126028917	0.064327	0.064327	10	0.11236	17.2205	370	ABL1;NOTCH1;SET;BRD3	NOTCH1;PPP6C;TSC1	RALGDS;NUP214;CNTRL;FNBP1			NOTCH1					-
AMP	10p15.3	chr10:1-520032	chr10:1-360288	chr10:1-4792688	0.00027121	0.00027121	25	0.280899	0.520031	5											-
AMP	11q23.3	chr11:118176602-124962611	chr11:118338036-120352689	chr11:118185965-135086622	0.0029494	0.033497	17	0.191011	6.78601	124	CBL;DDX6;KMT2A;BCL9L;FOXR1	CBL;ARHGEF12;BCL9L									-
AMP	11q25	chr11:132802105-135086622	chr11:133404135-135086622	chr11:118185965-135086622	5.9253e-05	0.0011696	16	0.179775	2.28452	17											-
AMP	12p13.32	chr12:1-10038430	chr12:3152569-5009510	chr12:1-10057697	0.0033736	0.0033736	21	0.235955	10.0384	184	CCND2;CHD4;KDM5A	PTPN6	ERC1;ZNF384				YES	CCND2	YES		CCND2
AMP	12p11.21	chr12:14075935-37813772	chr12:31144110-31237968	chr12:31144110-31238714	0.24608	0.24608	14	0.157303	23.7378	117	KRAS	ETNK1	PPFIBP1	KRAS					YES	KRAS	KRAS
AMP	12q14.1	chr12:57636373-58105416	chr12:57784366-57997465	chr12:57784366-58025648	0.12315	0.12315	7	0.0786517	0.469043	17							YES	CDK4	YES	CDK4	CDK4
AMP	12q24.33	chr12:120436438-133275309	chr12:133140469-133275309	chr12:123319343-133275309	0.0094287	0.0094287	10	0.11236	12.8389	165		POLE;HNF1A;NCOR2;SETD1B	BCL7A;CLIP1;ZCCHC8	TMEM132C	SETD1B						-
AMP	13q33.3	chr13:73076830-114364328	chr13:109129462-110060409	chr13:109129462-110088886	0.24608	0.24608	5	0.0561798	41.2875	246		GPC5;SOX21					YES	IRS2	YES		-
AMP	14q11.2	chr14:20745525-26836718	chr14:23646265-23752500	chr14:23646265-23768149	0.24608	0.24608	5	0.0561798	6.09119	129									YES		-
AMP	19p13.11	chr19:13218632-21985588	chr19:18116543-18930213	chr19:17069224-18957031	0.054496	0.054496	10	0.11236	8.76696	221	JAK3;PRKACA;CRTC1;BRD4	ELL	DNAJB1;TPM4;ZNF429						YES		-
DEL	2p25.3	chr2:1-10241115	chr2:1-645861	chr2:1-1403952	0.1483	0.1483	10	0.11236	10.2411	66							YES		YES		-
DEL	2q37.3	chr2:241512238-242193529	chr2:241694009-242193529	chr2:218222350-242193529	1.2371e-10	1.2371e-10	27	0.303371	0.681291	15									YES		-
DEL	3p26.3	chr3:1-1039450	chr3:1-418782	chr3:1-439598	0.15827	0.15827	10	0.11236	1.03945	4									YES		-
DEL	3q29	chr3:192155426-198295559	chr3:196201219-198295559	chr3:196201219-198295559	0.17052	0.17052	10	0.11236	6.14013	86	MUC4		TFRC;MB21D2				YES				-
DEL	4q35.2	chr4:172598868-190214555	chr4:189198549-189341048	chr4:171988842-190214555	0.00031579	0.00031579	19	0.213483	17.6157	92		CASP3;FAT1					YES	FAT1;ING2	YES	FAT1	FAT1
DEL	5p15.33	chr5:1-2290986	chr5:1-185031	chr5:1-2309745	0.01271	0.01271	14	0.157303	2.29099	41	TERT	SDHA;TERT									-
DEL	6p25.3	chr6:1-765322	chr6:1-527512	chr6:1-543744	0.15972	0.15972	9	0.101124	0.765321	6	IRF4	IRF4					YES				IRF4
DEL	8q24.3	chr8:142315652-145138636	chr8:144430240-145138636	chr8:144430240-145138636	0.17052	0.17052	7	0.0786517	2.82298	116									YES		-
DEL	9p21.3	chr9:21379468-22160454	chr9:21843828-22131825	chr9:21262507-22793286	0.0056828	0.0056828	24	0.269663	0.780986	11		CDKN2A			CDKN2A		YES	CDKN2A;CDKN2B	YES	CDKN2A;CDKN2B	CDKN2A
DEL	10q26.3	chr10:110558679-133797422	chr10:128758975-131929661	chr10:128032991-133797422	0.021348	0.021348	16	0.179775	23.2387	196	FGFR2;TCF7L2	MGMT	SHTN1;VTI1A				YES		YES		MGMT
DEL	11p15.5	chr11:1321848-3693477	chr11:1735062-3483421	chr11:1-14699218	2.4198e-09	2.4198e-09	37	0.41573	2.37163	65		CARS1					YES	IGF2;MIR483			-
DEL	12q12	chr12:39979407-49738171	chr12:42105594-42280911	chr12:42013858-42905152	0.061194	0.076748	16	0.179775	9.75876	96	KMT2D	KMT2D;ARID2	COL2A1;PRPF40B		ARID2		YES	ARID2			ARID2
DEL	12q24.33	chr12:132798383-133275309	chr12:133155035-133275309	chr12:132634476-133275309	0.023842	0.061253	12	0.134831	0.476926	11									YES		-
DEL	14q32.2	chr14:59448949-107043718	chr14:98301975-98439744	chr14:98301975-98468127	0.15972	0.15972	18	0.202247	47.5948	536	AKT1;HIF1A;SIX1;TSHR;TCL1A;BCL11B	MAX;RAD51B;DICER1;BCL11B	HSP90AA1;TRIP11;GOLGA5;GPHN						YES		-
DEL	19q13.43	chr19:54369814-58617616	chr19:58207333-58617616	chr19:58207333-58617616	0.17052	0.17052	21	0.235955	4.2478	181									YES		-
Oligodendroglioma (n=58)
TYPE	LOCUS	WIDE_PEAK	PEAK	REGION	Q	Q_RESIDUAL	N_CNA	FREQ_CNA	WIDE_PEAK_SIZE_MB	N_GENES	CGC_ONCOGENE	CGC_TSG	CGC_AMBIGUOUS	MUT_ONCOGENE	MUT_TSG	MUT_AMBIGUOUS	TCGA_TUMOUR_PEAK	TCGA_TUMOUR_HIGHLIGHTED	TCGA_PANCAN_PEAK	TCGA_PANCAN_HIGHLIGHTED	CONSENSUS
AMP	10q26.3	chr10:133382731-133797422	chr10:133391166-133797422	chr10:133391166-133797422	0.005139	0.005139	4	0.0689655	0.414691	9											-
AMP	17q12	chr17:36111776-36478736	chr17:36111838-36470398	chr17:36111838-36495413	0.20218	0.20218	4	0.0689655	0.36696	12											-
AMP	19p13.3	chr19:719505-932376	chr19:726483-930754	chr19:689005-959255	0.00012747	0.00012747	4	0.0689655	0.212871	17							YES				-
DEL	14q24.2	chr14:64814082-79203004	chr14:68614364-77281010	chr14:67871391-77924508	0.048581	0.048581	9	0.155172	14.3889	157		MAX;RAD51B	GPHN						YES		-

[truncated: 17 more sheets: ST11 - clinicalgenomic fisher, ST12 - clinicalgenomic kruskal, ST13 - clinicalgenomic spearman, ST14 - clinicalgenomic cox ph, ST15 - MMR+POLE Tumours, ST16 - SV hotspots, ST17 - neoantigen, IE mechanism, ST18 - actionable alterations, ST19 - Telomere content, ST20_Fisher's test (Overview), ST21_Kruskall test (Overview), ST22_Spearman (Overview), ST23 - survival summary, ST24 - clinicogenomic summary, ST25 - non-canonical TERT mut, ST26 - TERT and ATRX carriers, ST27 - depmap]
